# Supplementary material
Source: PubMed Central journal article supplement (PMC3164803)

**Supporting Information**

**For**

**Multicomponent Assembly Strategies for the Synthesis of Diverse  
Tetrahydroisoquinoline Scaffolds**

Brett A. Granger, Kyosuke Kaneda, and Stephen F. Martin\*

*Department of Chemistry and Biochemistry and  
The Texas Institute for Drug and Diagnostic Development*

*The University of Texas at Austin, Austin, Texas 78712*

[sfmartin@mail.utexas.edu](mailto:sfmartin@mail.utexas.edu)

## Experimental Section

**General Methods.** Methanol (MeOH), acetonitrile (CH<sub>3</sub>CN), and *N,N*-dimethylformamide (DMF) were dried by filtration through two columns of activated molecular sieves. Tetrahydrofuran (THF) and toluene were passed through two columns of activated neutral alumina prior to use. Triethylamine (Et<sub>3</sub>N), *N,N*-diisopropylamine, benzene, dichloromethane (CH<sub>2</sub>Cl<sub>2</sub>), 1,2-dimethoxyethane (DME), morpholine, piperidine, *trans*-crotonyl chloride, 2-furoyl chloride, phenyl isocyanate, and boron trifluoride diethyl etherate (BF<sub>3</sub>·OEt<sub>2</sub>) were freshly distilled over CaH<sub>2</sub>. Trimethylsilyl trifluoromethanesulfonate (TMSOTf) was distilled over P<sub>2</sub>O<sub>5</sub>. Zinc chloride (ZnCl<sub>2</sub>) was fused by melting under vacuum prior to use. Thionyl chloride (SOCl<sub>2</sub>) was distilled from triphenylphosphite. All solvents used for palladium-catalyzed cross-coupling reactions were degassed by sparging with nitrogen for 20 min prior to use. All other reagents and solvents were reagent grade and were purchased and used as received unless otherwise noted. Reactions were performed under a nitrogen or argon atmosphere in round-bottom flasks sealed under rubber septa with magnetic stirring, unless otherwise noted. Water sensitive reactions were performed with flame- or oven-dried glassware, stir-bars and steel needles. Reaction temperatures are reported as the temperatures of the bath surrounding the vessel. Sensitive reagents and solvents were transferred using plastic or oven-dried glass syringes and steel needles using standard techniques.

Proton nuclear magnetic resonance (<sup>1</sup>H NMR) and carbon nuclear magnetic resonance (<sup>13</sup>C NMR) spectra were acquired in CDCl<sub>3</sub> unless otherwise noted. Chemical shifts are reported in parts per million (ppm, δ), downfield from tetramethylsilane (TMS, δ = 0.00 ppm) and are referenced to residual solvent (CDCl<sub>3</sub>, δ = 7.26 ppm (<sup>1</sup>H) and 77.16 ppm (<sup>13</sup>C)). Coupling constants (*J*) are reported in hertz (Hz) and the resonance multiplicity abbreviations used are: s, singlet; d, doublet; t, triplet; dt, doublet of triplets; td, triplet of doublets; dd, doublet of doublets; ddd, doublet of doublet of doublets; m, multiplet; comp, overlapping multiplets of magnetically non-equivalent protons. The abbreviations br and app stand for broad and apparent, respectively. Infrared (IR) spectra were obtained with a Thermo Scientific Nicolet IR-100 FT-IR series spectrometer as thin films on sodium chloride plates. Melting points were determined using a Thomas-Hoover Uni-melt capillary melting point apparatus. Thin-layer chromatography (TLC) was performed on EMD 60 F<sub>254</sub> glass-backed pre-coated silica gel plates and were visualized

using one or more of the following methods: UV light (254 nm) and staining with basic potassium permanganate (KMnO<sub>4</sub>) or acidic *p*-anisaldehyde (PAA). Flash chromatography was performed using glass columns and with Silicycle SiliaFlash F60 (40-63 μm) silica gel eluting with the solvents indicated according to the procedure of Still.<sup>1</sup>

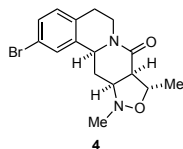

**4-Bromo-13,15-dimethyl-14-oxa-10,15-diazatetracyclo[8.7.0.0<sup>2,7</sup>.0<sup>12,16</sup>]heptadeca-2,4,6-trien-11-one (4).** *trans*-Crotonoyl chloride (548 mg, 0.5 mL, 5.24 mmol) was added to a solution of imine **1** (1.0 g, 4.76 mmol) and silyl enol ether **2**<sup>2</sup> (0.90 g, 1.1 mL, 5.71 mmol) in CH<sub>3</sub>CN (95 mL) at room temperature. Freshly distilled trimethylsilyl trifluoromethanesulfonate (106 mg, 86 μL, 0.47 mmol) was added, and the reaction was stirred for 0.5 h at room temperature. The mixture was then partitioned between saturated aqueous NaHCO<sub>3</sub> (200 mL) and CH<sub>2</sub>Cl<sub>2</sub> (200 mL). The layers were separated, and the aqueous layer was extracted with CH<sub>2</sub>Cl<sub>2</sub> (2 × 100 mL). The combined organic layers were dried (Na<sub>2</sub>SO<sub>4</sub>) and concentrated under reduced pressure. The crude amide **3** thus obtained was dissolved in toluene (80 mL) containing *N*-methylhydroxylamine hydrochloride (0.44 g, 5.24 mmol) and Et<sub>3</sub>N (577 mg, 0.8 mL, 5.71 mmol), and the mixture was heated at 50 °C for 4 h. The reaction was partitioned between toluene (20 mL) and H<sub>2</sub>O (100 mL), and the layers were separated. The aqueous layer was extracted with toluene (2 × 50 mL), and the combined organic layers were dried (Na<sub>2</sub>SO<sub>4</sub>) and concentrated under reduced pressure. The resultant yellow solid was recrystallized from MeOH to give 1.1 g (66% over 2 steps) of isoxazolidine **4** as small white crystals: mp 190.5-192 °C; <sup>1</sup>H NMR (600 MHz) δ 7.34-7.32 (comp, 2 H), 7.05 (d, *J* = 7.8 Hz, 1 H), 4.82-4.77 (m, 1 H), 4.64 (dd, *J* = 12.0, 1.8 Hz, 1 H), 4.33-4.29 (m, 1 H), 3.17 (br s, 1 H), 2.86-2.72 (comp, 4 H), 2.70 (s, 3 H), 2.36 (ddd, *J* = 13.2, 7.2, 2.4 Hz, 1 H), 1.65-1.59 (m, 1 H), 1.52 (d, *J* = 6.0 Hz, 3 H); <sup>13</sup>C NMR (150 MHz) δ 169.3, 137.8, 134.3, 130.5, 130.0, 129.1, 120.3, 76.4, 65.0, 53.7, 53.4, 44.0, 38.5, 36.7, 28.8, 20.0; IR (neat) 2966, 2839, 1641, 1432 cm<sup>-1</sup>; mass spectrum (CI) *m/z* 351.0706 [C<sub>16</sub>H<sub>20</sub><sup>79</sup>BrN<sub>2</sub>O<sub>2</sub> (M+1) requires 351.0708].<sup>3</sup>

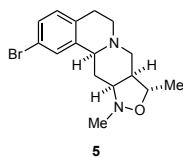

**4-Bromo-13,15-dimethyl-14-oxa-10,15-diazatetracyclo[8.7.0.0<sup>2,7</sup>.0<sup>12,16</sup>]heptadeca-2,4,6-triene (5).** To a suspension of NaBH<sub>4</sub> (57 mg, 1.5 mmol) in anhydrous THF (3 mL) at 0 °C was added BF<sub>3</sub>·OEt<sub>2</sub> (0.25 g, 0.22 mL, 1.8 mmol), and the mixture was stirred at 0 °C for 20 min. A solution of lactam **4** (100 mg, 0.30 mmol) in anhydrous THF (7 mL) was added slowly at 0 °C, and the mixture was warmed to room temperature and stirred for 24 h. A solution of 5 M aqueous HCl (5 mL) was added, and the mixture was heated at 70 °C for 2 h and then cooled to 0 °C. The acidic solution was made basic (pH > 10) with 5 M aqueous NaOH (~7 mL) at 0 °C, and then partitioned with CH<sub>2</sub>Cl<sub>2</sub> (10 mL). The layers were separated, and the aqueous layer was extracted with CH<sub>2</sub>Cl<sub>2</sub> (2 × 10 mL). The combined organic layers were dried (Na<sub>2</sub>SO<sub>4</sub>), filtered, and concentrated under reduced pressure. The resultant yellow oil was purified by flash column chromatography eluting with hexanes/EtOAc (1 : 9) to give 79 mg (82%) of **5** as a white solid: mp 140.5-141 °C; <sup>1</sup>H NMR (600 MHz) δ 7.31 (d, *J* = 1.8 Hz, 1 H), 7.24 (dd, *J* = 7.8, 1.8 Hz, 1 H), 6.95 (d, *J* = 7.8 Hz, 1 H), 4.31-4.27 (m, 1 H), 3.24 (br s, 1 H), 3.09 (d, *J* = 11.8 Hz, 1 H), 3.06-3.00 (m, 1 H), 2.97-2.96 (m, 1 H), 2.87 (ddd, *J* = 11.4, 5.7, 1.4 Hz, 1 H), 2.75 (s, 3 H), 2.63 (dd, *J* = 11.7, 4.2 Hz, 1 H), 2.63-2.58 (m, 1 H), 2.50-2.47 (m, 1 H), 2.43 (ddd, *J* = 12.0, 11.4, 3.5 Hz, 1 H), 2.43-2.34 (m, 1 H), 1.71-1.67 (m, 1 H), 1.37 (d, *J* = 3.6 Hz, 3 H); <sup>13</sup>C NMR (150 MHz) δ 139.8, 133.7, 130.4, 129.1, 128.3, 119.6, 77.0, 65.8, 60.2, 54.1, 51.7, 47.4, 45.9, 35.0, 29.2, 21.3; IR (neat) 2920, 2757, 1114, 908, 731 cm<sup>-1</sup>; mass spectrum (ESI) *m/z* 337.0910 [C<sub>16</sub>H<sub>22</sub><sup>79</sup>BrN<sub>2</sub>O (M+1) requires 337.0916].

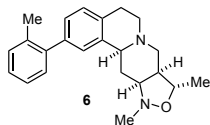

**13,15-Dimethyl-4-(2-methylphenyl)-14-oxa-10,15-diazatetracyclo[8.7.0.0<sup>2,7</sup>.0<sup>12,16</sup>]heptadeca-2,4,6-triene (6).** A mixture of bromide **5** (50 mg, 0.15 mmol), cesium fluoride (91 mg, 0.59 mmol), 2-methylbenzeneboronic acid (41 mg, 0.30 mmol), and [PdCl<sub>2</sub>(dppf)]·CH<sub>2</sub>Cl<sub>2</sub> (6.0 mg, 0.01 mmol) in degassed toluene (1 mL) was heated under reflux for 24 h. The reaction was cooled to room temperature and partitioned between EtOAc (3 mL) and H<sub>2</sub>O (3 mL), and the layers were separated. The aqueous layer was extracted with EtOAc (2 × 3 mL), and the

combined organic layers were dried (Na<sub>2</sub>SO<sub>4</sub>), filtered, and concentrated under reduced pressure. The resultant brown residue was purified by flash column chromatography eluting with EtOAc to give 49 mg (95%) of **6** as a tan solid: mp 151-152 °C; <sup>1</sup>H NMR (400 MHz) δ 7.26-7.09 (comp, 7 H), 4.38-4.31 (m, 1 H), 3.24 (br s, 1 H), 3.21-3.13 (comp, 2 H), 3.02-2.98 (m, 1H), 2.91 (ddd, *J* = 11.2, 5.6, 1.6 Hz, 1 H), 2.75 (s, 3 H), 2.75-2.70 (m, 1 H), 2.67 (dd, *J* = 12.2, 4.0 Hz, 1 H), 2.52 (ddd, *J* = 11.6, 11.6, 3.2 Hz, 1 H), 2.53-2.43 (comp, 2 H), 2.26 (s, 3 H), 1.79-1.70 (m, 1 H), 1.38 (d, *J* = 5.6 Hz, 3 H); <sup>13</sup>C NMR (100 MHz) δ 141.9, 139.5, 137.3, 135.4, 133.2, 130.3, 129.8, 128.5, 127.1, 126.9, 126.1, 125.7, 77.0, 65.9, 60.6, 54.2, 52.0, 47.4, 46.1, 35.1, 29.5, 21.4, 20.6; IR (neat) 2919, 2755, 1482, 1459, 911, 759, 730; mass spectrum (ESI) *m/z* 349.2273 [C<sub>23</sub>H<sub>29</sub>N<sub>2</sub>O (M+1) requires 349.2280].

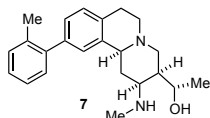

**2-Methylamino-10-*o*-tolyl-2,3,4,6,7,11*b*-hexahydro-1*H*-pyrido[2,1-*a*]isoquinolin-3-yl)ethanol (7).** Sodium borohydride (33 mg, 0.86 mmol) was added to a solution of isoxazolidine **6** (50 mg, 0.14 mmol) and nickel(II) chloride hexahydrate (72 mg, 0.29 mmol) in anhydrous MeOH (2.9 mL), and the reaction was stirred for 5 h at room temperature. The solvent was removed in vacuo, and the black residue was partitioned between concentrated NH<sub>4</sub>OH (28 mL) and CH<sub>2</sub>Cl<sub>2</sub> (28 mL) and stirred for 12 h at room temperature. The layers were separated, and the aqueous layer was extracted with CH<sub>2</sub>Cl<sub>2</sub> (2 × 10 mL). The combined organic layers were dried (Na<sub>2</sub>SO<sub>4</sub>), filtered, and concentrated under reduced pressure. The resultant yellow oil was purified by flash column chromatography eluting with EtOAc/MeOH (5 : 1) containing 1% Et<sub>3</sub>N to give 45 mg (90%) of **7** as a clear gum: <sup>1</sup>H NMR (400 MHz) δ 7.26-7.12 (comp, 7 H), 4.49-4.42 (m, 1 H), 3.24 (d, *J* = 10.4 Hz, 1 H), 3.16 (ddd, *J* = 18.0, 12.0, 6.4 Hz, 1 H), 2.96 (dd, *J* = 12.0, 6.4 Hz, 1 H), 2.97-2.92 (m, 1 H), 2.90-2.85 (m, 1 H), 2.72 (dd, *J* = 16.0, 3.2 Hz, 1 H), 2.53 (s, 3 H), 2.46 (ddd, *J* = 12.0, 12.0, 4.0 Hz, 1 H), 2.34-2.28 (comp, 2 H), 2.27 (s, 3 H), 1.95-1.83 (comp, 2 H), 1.23 (d, *J* = 6.0 Hz, 3 H); <sup>13</sup>C NMR (100 MHz) δ 141.9, 139.4, 137.4, 135.4, 133.2, 130.3, 129.8, 128.6, 127.2, 127.0, 125.7, 125.2, 67.0, 62.9, 62.5, 57.7, 52.6, 41.9, 34.3, 33.8, 29.5, 21.4, 20.6; IR (neat) 3200, 2926, 2802, 1482, 1118, 910, 760, 731; mass spectrum (ESI) *m/z* 351.2431 [C<sub>23</sub>H<sub>31</sub>N<sub>2</sub>O (M+1) requires 351.2436].

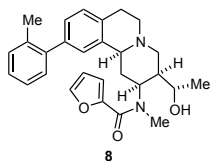

***N*-(3-(1-Hydroxyethyl)-10-*o*-tolyl-2,3,4,6,7,11*b*-hexahydro-1*H*-pyrido[2,1-*a*]isoquinolin-2-yl)-*N*-methylfuran-2-carboxamide (**8**).** Freshly distilled 2-furoyl chloride (8.8 mg, 6.7  $\mu$ L, 0.07 mmol) was added to a solution of amine **7** (22 mg, 0.06 mmol) and Et<sub>3</sub>N (7.6 mg, 10  $\mu$ L, 0.07 mmol) in CH<sub>2</sub>Cl<sub>2</sub> (1 mL) at 0 °C. The mixture was warmed to room temperature, and stirred for 3 h. The reaction was partitioned between CH<sub>2</sub>Cl<sub>2</sub> (2 mL) and saturated aqueous NaHCO<sub>3</sub> (2 mL), and the layers were separated. The aqueous layer was extracted with CH<sub>2</sub>Cl<sub>2</sub> (2  $\times$  2 mL), and the combined organic layers were dried (Na<sub>2</sub>SO<sub>4</sub>), filtered, and concentrated under reduced pressure. The resultant yellow oil was purified by flash column chromatography eluting with hexanes/EtOAc (1 : 1  $\rightarrow$  1 : 2) to give 21 mg (77%) of **8** as a pale yellow oil: <sup>1</sup>H NMR (400 MHz)  $\delta$  7.49 (dd, *J* = 1.6, 0.8 Hz, 1 H), 7.27-7.14 (comp, 7 H), 6.97 (d, *J* = 3.2 Hz, 1 H), 6.48 (dd, *J* = 3.2, 1.6 Hz, 1 H), 4.74 (ddd, *J* = 12.8, 4.8, 4.8 Hz, 1 H), 4.36-4.25 (m, 1 H), 3.47 (d, *J* = 9.6 Hz, 1 H), 3.33 (s, 3 H), 3.23-3.16 (m, 1 H), 3.07-2.97 (comp, 2 H), 2.85 (dd, *J* = 11.4, 2.4 Hz, 1 H), 2.80-2.76 (m, 1 H), 2.58 (ddd, *J* = 12.0, 11.4, 3.2 Hz, 1 H), 2.53-2.32 (comp, 3 H), 2.28 (s, 3 H), 1.25 (d, *J* = 7.2 Hz, 3 H); <sup>13</sup>C NMR (100 MHz)  $\delta$  161.0, 148.3, 143.8, 141.7, 139.7, 136.8, 135.4, 132.7, 130.4, 129.8, 128.6, 127.4, 127.3, 125.8, 125.5, 116.0, 111.1, 77.2, 73.3, 63.3, 62.7, 56.2, 52.3, 33.6, 33.4, 29.6, 21.3, 20.6; IR (neat) 3395, 2928, 1613, 1485, 1073, 909, 758, 731; mass spectrum (ESI) *m/z* 445.2486 [C<sub>28</sub>H<sub>33</sub>N<sub>2</sub>O<sub>3</sub> (M+1) requires 445.2491].

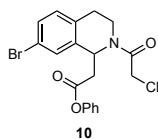

**Phenyl 2-(7-bromo-2-(2-chloroacetyl)-1,2,3,4-tetrahydroisoquinolin-1-yl)acetate (**10**).** Trimethylsilyl trifluoromethanesulfonate (27.1 mg, 22  $\mu$ L, 0.12 mmol) was added to a solution of imine **1** in THF (4.8 mL) at  $-78$  °C. Silyl ketene acetal **9**<sup>4</sup> (743 mg, 3.57 mmol) and chloroacetyl chloride (162 mg, 114  $\mu$ L, 1.43 mmol) were added, and the reaction was stirred at  $-78$  °C for 22 h. The reaction was partitioned between CH<sub>2</sub>Cl<sub>2</sub> (20 mL) and H<sub>2</sub>O (20 mL), and the layers were separated. The aqueous layer was extracted with CH<sub>2</sub>Cl<sub>2</sub> (2  $\times$  15 mL), and the combined organic layers were dried (Na<sub>2</sub>SO<sub>4</sub>) and concentrated under reduced pressure. The

resultant yellow oil was purified by flash column chromatography eluting with hexanes/EtOAc (7 : 3) to give 446 mg (89%) of **10** as a white powder: mp 139-141°C; <sup>1</sup>H NMR (600 MHz) (rotamers) δ 7.47 (d, *J* = 1.8 Hz, 0.63 H), 7.42-7.36 (comp, 3.45 H), 7.27-7.28 (m, 0.30 H), 7.23-7.21 (m, 0.67 H), 7.11-7.09 (comp, 1.27 H), 7.06-7.05 (comp, 1.71 H), 6.07 (t, *J* = 6.6 Hz, 0.64 H), 5.48 (dd, *J* = 9.6, 4.8 Hz, 0.36 H), 4.73 (dd, *J* = 13.2, 6.0 Hz, 0.38 H), 4.54 (d, *J* = 12.6 Hz, 0.37 H), 4.19-4.09 (comp, 1.69 H), 3.93 (ddd, *J* = 9.0, 4.8, 3.6 Hz, 0.66 H), 3.73 (ddd, *J* = 13.2, 10.2, 4.2 Hz, 0.65 H), 3.24 (dd, *J* = 16.2, 9.6 Hz, 0.38 H), 3.19 (ddd, *J* = 13.2, 12.0, 4.2 Hz, 0.38 H), 3.10-2.94 (comp, 2.73 H), 2.88 (ddd, *J* = 7.8, 4.2, 4.2 Hz, 0.66 H), 2.77-2.74 (m, 0.37 H); <sup>13</sup>C NMR (150 MHz) (rotamers) δ 169.3, 168.6, 166.2, 165.8, 150.5, 150.1, 137.3, 137.0, 133.0, 132.4, 131.3, 131.0, 130.7, 130.5, 130.0, 129.7, 129.5, 129.2, 126.4, 126.0, 121.6, 121.3, 120.5, 120.2, 53.4, 50.1, 41.7, 41.2, 41.1, 40.6, 35.9, 28.6, 27.1; IR (neat) 2946, 1751, 1654, 1485, 1430, 1193, 1136, 816, 750, 690 cm<sup>-1</sup>; mass spectrum (CI) *m/z* 422.0156 [C<sub>19</sub>H<sub>18</sub><sup>79</sup>Br<sup>35</sup>ClNO<sub>3</sub> (M+1) requires 422.0159].

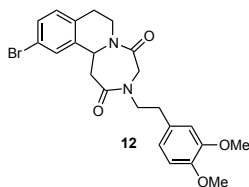

**11-Bromo-3-(3,4-dimethoxyphenethyl)-1,3,4,7,8,12b-hexahydro-[1,4]diazepino[7,1-a]isoquinoline-2,5-dione (12).** A solution of amide **10** (30 mg, 0.07 mmol), 3,4-dimethoxyphenethylamine (**11**) (15 mg, 14 μL, 0.09 mmol), and *N,N*-diisopropylethylamine (12 mg, 16 μL, 0.09 mmol) in CH<sub>3</sub>CN (1.8 mL) was heated at 75 °C for 24 h. The reaction was cooled to room temperature and partitioned between CH<sub>2</sub>Cl<sub>2</sub> (15 mL) and saturated aqueous NaHCO<sub>3</sub> (15 mL). The layers were separated, and the aqueous layer was extracted with CH<sub>2</sub>Cl<sub>2</sub> (2 × 15 mL). The combined organic layers were dried (Na<sub>2</sub>SO<sub>4</sub>) and concentrated under reduced pressure, and the resultant yellow oil was purified by flash column chromatography eluting with toluene/EtOAc (2 : 8) to provide 23 mg (69%) of **12** as a white solid: mp 160-161 °C; <sup>1</sup>H NMR (600 MHz) δ 7.37-7.35 (comp, 2 H), 7.03 (d, *J* = 7.8 Hz, 1 H), 6.80-6.75 (comp, 3 H), 4.91 (dd, *J* = 12.0, 3.6 Hz, 1 H), 4.30 (ddd, *J* = 9.0, 4.2, 4.2 Hz, 1 H), 4.14 (d, *J* = 16.8 Hz, 1 H), 4.07 (d, *J* = 16.8 Hz, 1 H), 3.88-3.81 (comp, 7 H), 3.67-3.65 (m, 1 H), 3.14 (dd, *J* = 15.6, 3.6 Hz, 1 H), 3.10 (ddd, *J* = 12.6, 10.2, 3.6 Hz, 1 H), 3.02 (dd, *J* = 15.6, 12.0 Hz, 1 H), 2.91 (ddd, *J* = 16.2, 10.8, 5.4 Hz, 1 H), 2.87-2.80 (comp, 2 H), 2.72 (ddd, *J* = 16.2, 4.2, 4.2 Hz, 1H); <sup>13</sup>C NMR (150 MHz) δ

168.8, 167.2, 149.0, 147.7, 137.3, 134.3, 130.8, 130.7, 130.5, 128.5, 120.8, 120.4, 112.1, 111.3, 56.0, 55.9, 54.5, 53.9, 50.1, 41.7, 41.4, 33.7, 27.9; IR (neat) 2935, 1662, 1635, 1516, 1465, 1262, 731 cm<sup>-1</sup>; mass spectrum (CI) *m/z* 473.1070 [C<sub>23</sub>H<sub>26</sub><sup>79</sup>BrN<sub>2</sub>O<sub>4</sub> (M+1) requires 473.1076].

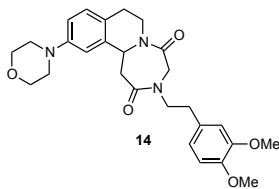

**3-(3,4-Dimethoxyphenethyl)-11-morpholino-1,3,4,7,8,12*b*-hexahydro-[1,4]diazepino[7,1-*a*]isoquinoline-2,5-dione (14).** A suspension of (±)-BINAP (3.3 mg, 0.01 mmol) in toluene (0.60 mL) was heated at 80 °C until a homogeneous solution was observed (~5 min). The reaction was cooled to room temperature, whereupon Pd(OAc)<sub>2</sub> (0.9 mg, 0.01 mmol) was added. The reaction was stirred for 1 min at room temperature. Morpholine (**13**) (7.5 mg, 7.4 μL, 0.09 mmol) was added, followed by bromide **12** (33.5 mg, 0.07 mmol) and NaO*t*-Bu (9.6 mg, 0.10 mmol). The reaction was heated at 80 °C for 2 h and then cooled to room temperature. The mixture was filtered through a pad of celite and concentrated under reduced pressure. The resultant yellow residue was purified by flash column chromatography eluting with EtOAc/MeOH (9 : 1) to yield 24 mg (72%) of **14** as a yellow solid: mp 69-70 °C; <sup>1</sup>H NMR (600 MHz) δ 7.07 (d, *J* = 8.4 Hz, 1 H), 6.82 (dd, *J* = 8.4, 2.4 Hz, 1 H), 6.79-6.78 (m, 1 H), 6.76-6.75 (comp, 2 H), 6.73 (d, *J* = 2.4 Hz, 1 H), 4.95 (dd, *J* = 12.0, 3.6 Hz, 1 H), 4.27 (ddd, *J* = 9.6, 4.8, 4.8 Hz, 1 H), 4.22 (d, *J* = 16.8 Hz, 1 H), 4.03 (d, *J* = 16.8 Hz, 1 H), 3.88-3.80 (comp, 11 H), 3.67 (ddd, *J* = 13.8, 8.4, 6.6 Hz, 1 H), 3.18-3.11 (comp, 6 H), 3.01 (dd, *J* = 16.2, 12.0 Hz, 1 H), 2.90 (ddd, *J* = 15.6, 10.8, 5.4 Hz, 1 H), 2.86-2.81 (m, 2 H), 2.70 (ddd, *J* = 15.6, 4.2 Hz, 1 H); <sup>13</sup>C NMR (150 MHz) δ 169.2, 167.3, 150.4, 148.9, 147.7, 135.8, 130.7, 129.7, 126.6, 120.8, 115.6, 112.7, 112.0, 111.3, 66.8, 56.0, 55.9, 55.0, 53.9, 50.5, 49.6, 42.2, 41.9, 33.7, 27.5; IR (neat) 2934, 2854, 1659, 1634, 1515, 1450, 1262, 1239, 730 cm<sup>-1</sup>; mass spectrum (CI) *m/z* 480.2495 [C<sub>27</sub>H<sub>34</sub>N<sub>3</sub>O<sub>5</sub> (M+1) requires 480.2498].

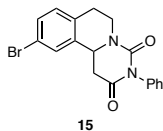

**10-Bromo-3-phenyl-6,7-dihydro-1*H*-pyrimido[6,1-*a*]isoquinoline-2,4(3*H*,11*bH*)-dione (15).** Trimethylsilyl trifluoromethanesulfonate (16 mg, 13 μL, 0.071 mmol) was added slowly to a solution of 7-bromodihydroisoquinoline (**1**) (30 mg, 0.14 mmol) in DME (1.5 mL) at



-40 °C. Silyl ketene acetal **9** (45 mg, 0.21 mmol) was added, and the reaction was stirred for 14 h at -40 °C, whereupon phenyl isocyanate (51 mg, 47  $\mu$ L, 0.43 mmol) was added. The reaction was warmed to room temperature and stirred for 2 h. The reaction mixture was partitioned between saturated aqueous NaHCO<sub>3</sub> (10 mL) and CH<sub>2</sub>Cl<sub>2</sub> (10 mL). The layers were separated, and the aqueous layer was extracted with CH<sub>2</sub>Cl<sub>2</sub> (2  $\times$  10 mL). The combined organic layers were dried (Na<sub>2</sub>SO<sub>4</sub>) and concentrated under reduced pressure. The resultant yellow solid was purified by flash chromatography eluting with hexanes/EtOAc (65 : 35) to give 33 mg (63%) of **15** as a white solid: mp 219-220 °C; <sup>1</sup>H NMR (500 MHz)  $\delta$  7.48-7.45 (comp, 2 H), 7.42-7.39 (comp, 2 H), 7.34-7.32 (m, 1 H), 7.21-7.19 (comp, 2 H), 7.11 (d,  $J$  = 8.0 Hz, 1 H), 4.99 (dd,  $J$  = 13.5, 3.5 Hz, 1 H), 4.63 (ddd,  $J$  = 12.5, 4.5, 2.5 Hz, 1 H), 3.23 (dd,  $J$  = 16.0, 3.5 Hz, 1 H), 3.11 (ddd,  $J$  = 12.0, 12.0, 3.5 Hz, 1 H), 2.99 (ddd,  $J$  = 16.5, 11.5, 5.0 Hz, 1 H), 2.86-2.80 (comp, 2 H); <sup>13</sup>C NMR (125 MHz)  $\delta$  168.0, 153.5, 135.7, 135.4, 133.3, 130.9, 130.7, 129.2, 128.7, 128.6, 128.5, 120.7, 50.4, 40.7, 40.4, 28.8; IR (neat) 2924, 2862, 1723, 1678, 1431, 1287, 1248, 699 cm<sup>-1</sup>; mass spectrum (ESI)  $m/z$  371.0391 [C<sub>18</sub>H<sub>16</sub><sup>79</sup>BrN<sub>2</sub>O<sub>2</sub> (M+1) requires 371.0395].

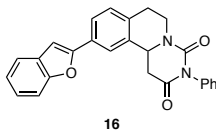

**10-(Benzofuran-2-yl)-3-phenyl-6,7-dihydro-1H-pyrimido[6,1-a]isoquinoline-**

**2,4(3H,11bH)-dione (16).** A mixture of bromide **15** (31 mg, 0.08 mmol), cesium carbonate (55 mg, 0.17 mmol), benzofuran-2-ylboronic acid (27 mg, 0.17 mmol), and bis(tri-*tert*-butylphosphine)palladium(0) (0.5 mg, 0.001 mmol) in degassed toluene (1.1 mL) was heated at 90 °C for 3 h. The reaction was cooled to room temperature and filtered through a pad of celite. The filtrate was concentrated under reduced pressure and purified by flash chromatography eluting with hexanes/EtOAc (6 : 4) to provide 31 mg (92%) of **16** as a white solid: mp 240-241 °C (colorless crystals from *i*-PrOH); <sup>1</sup>H NMR (400 MHz)  $\delta$  7.76-7.72 (comp, 2 H), 7.60 (d,  $J$  = 7.6 Hz, 1 H), 7.53 (d,  $J$  = 8.4 Hz, 1 H), 7.51-7.40 (comp, 3 H), 7.34-7.23 (comp, 5 H), 7.03 (s, 1 H), 5.11 (dd,  $J$  = 13.6, 3.2 Hz, 1 H), 4.67 (ddd,  $J$  = 7.2, 4.4, 4.4 Hz, 1 H), 3.40 (dd,  $J$  = 16.8, 3.6 Hz, 1 H), 3.22-3.06 (comp, 2 H), 2.95-2.87 (comp, 2 H); <sup>13</sup>C NMR (100 MHz)  $\delta$  168.4, 154.9, 153.6, 135.6, 134.6, 134.2, 129.8, 129.6, 129.2, 129.0, 128.7, 128.5, 124.6, 124.1, 123.1, 121.9, 121.0, 111.2, 101.6, 50.8, 40.9, 40.4, 29.1; IR (neat) 3061, 2924, 1723, 1676, 1432, 1249, 751, 698 cm<sup>-1</sup>; mass spectrum (ESI)  $m/z$  409.1552 [C<sub>26</sub>H<sub>21</sub>N<sub>2</sub>O<sub>3</sub> (M+1) requires 409.1552].

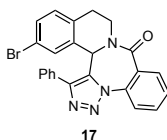

**20-Bromo-4,5,6,14-tetraazapentacyclo[12.8.0.0<sup>2,6</sup>.0<sup>7,12</sup>.0<sup>7,22</sup>]docosa-2,4,7,9,11,17(22),18,20-octaen-13-one (17).** Trimethylsilyl trifluoromethanesulfonate (58 mg, 47  $\mu$ L, 0.26 mmol) was added slowly to a solution of dihydroisoquinoline **1** (50 mg, 0.24 mmol) in THF (1.8 mL) at  $-23$   $^{\circ}$ C. The reaction was then cooled to  $-78$   $^{\circ}$ C. In a separate flask, *n*-BuLi (0.13 mL, 0.31 mmol, 2.36 M in hexanes) was added dropwise to a solution of phenylacetylene (34 mg, 36  $\mu$ L, 0.33 mmol) in THF (1.0 mL), and the brown solution was stirred 10 min at room temperature. The solution was cooled to  $-78$   $^{\circ}$ C, whereupon ZnCl<sub>2</sub> (0.38 mL, 0.38 mmol, 1 M in THF) was added dropwise, and the yellow solution stirred for 20 min at  $-78$   $^{\circ}$ C.<sup>7</sup> The solution of freshly prepared organozinc reagent was added dropwise to the solution of activated imine at  $-78$   $^{\circ}$ C and the reaction stirred 5 h at  $-78$   $^{\circ}$ C, whereupon *o*-azidobenzoyl chloride<sup>8</sup> (70 mg, 0.43 mmol) in THF (2.0 mL) was added slowly at  $-78$   $^{\circ}$ C. The bath was removed, and the reaction was stirred at room temperature for 20 h. The reaction mixture was partitioned between saturated aqueous NaHCO<sub>3</sub> (20 mL) and CH<sub>2</sub>Cl<sub>2</sub> (20 mL). The layers were separated, and the aqueous layer was extracted with CH<sub>2</sub>Cl<sub>2</sub> (2  $\times$  20 mL). The combined organic layers were washed with brine (1  $\times$  30 mL), dried (Na<sub>2</sub>SO<sub>4</sub>) and concentrated under reduced pressure. The resultant yellow solid was purified by flash chromatography eluting with toluene/EtOAc (4 : 1) to give 88 mg (80%) of **17** as a tan solid: mp 270  $^{\circ}$ C (decomposition); <sup>1</sup>H NMR (500 MHz)  $\delta$  8.12-8.09 (comp, 2 H), 7.77 (ddd, *J* = 8.1, 7.3, 1.5 Hz, 1 H), 7.62 (td, *J* = 7.8, 1.5 Hz, 1 H), 7.17-7.13 (comp, 2 H), 7.09-7.06 (comp, 2 H), 6.98-6.96 (comp, 3 H), 6.86 (d, *J* = 8.0 Hz, 1 H), 5.90 (s, 1 H), 4.38 (ddd, *J* = 10.7, 5.6, 5.6 Hz, 1 H), 3.63 (ddd, *J* = 13.4, 8.7, 5.6 Hz, 1 H), 2.89-2.78 (comp, 2 H); <sup>13</sup>C NMR (125 MHz)  $\delta$  165.8, 144.0, 134.4, 133.6, 133.1, 132.7, 131.8, 131.4, 130.9, 129.9, 129.8, 129.4, 129.3, 128.7, 128.1, 127.7, 127.4, 123.1, 120.2, 49.9, 38.8, 28.1; IR (neat) 3052, 2935, 1651, 1401, 760, 698 cm<sup>-1</sup>; mass spectrum (CI) *m/z* 457.0664 [C<sub>24</sub>H<sub>18</sub><sup>79</sup>BrN<sub>4</sub>O (M+1) requires 457.0664].

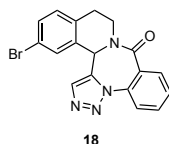

**20-Bromo-4,5,6,14-tetraazapentacyclo[12.8.0.0<sup>2,6</sup>.0<sup>7,12</sup>.0<sup>17,22</sup>]docosa-2,4,7(12),8,10,17,19,21-octaen-13-one (18).** Trimethylsilyl trifluoromethanesulfonate (58 mg, 47  $\mu$ L, 0.26 mmol) was added slowly to a solution of dihydroisoquinoline **1** (50 mg, 0.24 mmol) in THF (3.5 mL) at  $-23$   $^{\circ}$ C. The reaction was then cooled to  $-78$   $^{\circ}$ C. Ethynylmagnesium bromide (0.62 mL, 0.31 mmol, 0.5 M in THF) was then added dropwise and the reaction stirred 5 h at  $-78$   $^{\circ}$ C, whereupon *o*-azidobenzoyl chloride<sup>8</sup> (70 mg, 0.43 mmol) in THF (1.0 mL) was added slowly. The cooling bath was removed, and the reaction was stirred at room temperature for 20 h. The reaction mixture was partitioned between saturated aqueous NaHCO<sub>3</sub> (20 mL) and CH<sub>2</sub>Cl<sub>2</sub> (20 mL). The layers were separated, and the aqueous layer was extracted with CH<sub>2</sub>Cl<sub>2</sub> (2  $\times$  20 mL). The combined organic layers were dried (Na<sub>2</sub>SO<sub>4</sub>) and concentrated under reduced pressure. The resultant yellow oil was purified by flash chromatography eluting with pentane/EtOAc (1 : 1) to give 85 mg (93%) of **18** as a yellow solid: mp 213-215  $^{\circ}$ C; <sup>1</sup>H NMR (600 MHz)  $\delta$  8.12 (dd, *J* = 7.8, 1.2 Hz, 1 H), 8.06 (d, *J* = 7.8 Hz, 1 H), 7.77 (m, 1 H), 7.63 (app t, *J* = 7.2 Hz, 1 H), 7.52 (dd, *J* = 8.4, 1.8 Hz, 1 H), 7.37 (m, 1 H), 7.24 (d, *J* = 8.4 Hz, 1 H), 7.17 (s, 1 H), 5.74 (s, 1 H), 3.99 (ddd, *J* = 12.6, 6.6, 6.6 Hz, 1 H), 3.85 (ddd, *J* = 12.6, 6.6, 6.6 Hz, 1 H), 3.00-2.96 (comp, 2 H); <sup>13</sup>C NMR (150 MHz)  $\delta$  166.0, 139.6, 135.2, 133.2, 132.6, 132.2, 132.0, 131.4, 130.5, 130.4, 130.2, 129.4, 127.3, 122.8, 120.7, 49.2, 40.1, 28.2; IR (neat) 2926, 1637, 1488, 1403, 1250, 760, 732  $\text{cm}^{-1}$ ; mass spectrum (CI) *m/z* 381.0352 [C<sub>18</sub>H<sub>14</sub><sup>79</sup>BrN<sub>4</sub>O (M+1) requires 381.0351].

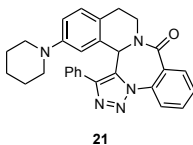

**3-Phenyl-20-(piperidin-1-yl)-4,5,6,14-tetraazapentacyclo[12.8.0.0<sup>2,6</sup>.0<sup>7,12</sup>.0<sup>17,22</sup>]-docosa-2,4,7(12),8,10,17,19,21-octaen-13-one (21).** A suspension of ( $\pm$ )-BINAP (15 mg, 0.03 mmol) in toluene (2.3 mL) was heated at 80  $^{\circ}$ C until a homogeneous solution was observed ( $\sim$ 5 min). The reaction was cooled to room temperature, whereupon Pd(OAc)<sub>2</sub> (3.7 mg, 0.02 mmol)

was added. The reaction was stirred for 1 min at room temperature. Piperidine (34 mg, 39  $\mu$ L, 0.39 mmol) was added, followed by bromide **17** (150 mg, 0.33 mmol) and NaOt-Bu (44 mg, 0.46 mmol), and the reaction was heated at 80 °C for 2 h. The reaction mixture was cooled to room temperature, filtered through a pad of celite, and concentrated under reduced pressure. The resultant yellow residue was purified by flash column chromatography eluting with hexanes/EtOAc (1 : 1) to yield 121 mg (80%) of **21** as a yellow solid: mp 267 °C (decomposition);  $^1\text{H}$  NMR (500 MHz)  $\delta$  8.15-8.12 (comp, 2 H), 7.77 (ddd,  $J$  = 8.0, 7.5, 1.5 Hz, 1 H), 7.64 (ddd,  $J$  = 7.5, 7.5, 1.0 Hz, 1 H), 7.16-7.12 (m, 1 H), 7.08-7.03 (comp, 4 H), 6.94 (d,  $J$  = 8.5 Hz, 1 H), 6.68 (dd,  $J$  = 8.5, 2.4 Hz, 1 H), 6.28 (d,  $J$  = 2.4 Hz, 1 H), 5.91 (s, 1 H), 4.53 (ddd,  $J$  = 13.0, 5.0, 5.0 Hz, 1 H), 3.56 (ddd,  $J$  = 13.5, 10.0, 4.5 Hz, 1 H), 2.93-2.79 (comp, 2 H), 2.73-2.66 (comp, 4 H), 1.52-1.40 (comp, 6 H);  $^{13}\text{C}$  NMR (125 MHz)  $\delta$  165.8, 151.3, 143.8, 134.3, 132.9, 132.8, 131.7, 129.8, 129.3, 129.1, 128.7, 128.2, 128.0, 127.7, 127.6, 125.6, 123.1, 117.6, 114.9, 50.8, 50.5, 39.2, 27.6, 25.5, 24.1; IR (neat) 3051, 2934, 2853, 2808, 1642, 1512, 1404, 1247, 1130, 761, 734, 696  $\text{cm}^{-1}$ ; mass spectrum (CI)  $m/z$  462.2280 [ $\text{C}_{29}\text{H}_{28}\text{N}_5\text{O}$  (M+1) requires 462.2294].

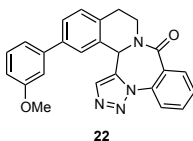

**20-(3-Methoxyphenyl)-4,5,6,14-tetraazapentacyclo[12.8.0.0<sup>2,6</sup>.0<sup>7,12</sup>.0<sup>17,22</sup>]docosa-2,4,7(12),8,10,17,19,21-octaen-13-one (22)**. A solution of bromide **18** (43 mg, 0.11 mmol), cesium carbonate (74 mg, 0.23 mmol), 3-methoxyphenylboronic acid (34 mg, 0.23 mmol), and bis(tri-*tert*-butylphosphine)palladium(0) (0.6 mg, 0.001 mmol) in degassed toluene (1 mL) was heated at 90 °C for 3 h. The reaction was cooled to room temperature, filtered through a pad of celite, and concentrated under reduced pressure. The resultant brown solid was purified by flash chromatography eluting with hexanes/EtOAc (1 : 1) to give 42 mg (90%) of biphenyl **22** as a white solid: mp 225 °C (decomposition);  $^1\text{H}$  NMR (500 MHz)  $\delta$  8.15 (dd,  $J$  = 8.0, 1.5 Hz, 1 H), 8.07 (dd,  $J$  = 8.0, 1.0 Hz, 1 H), 7.76 (ddd,  $J$  = 9.0, 8.0, 1.0 Hz, 1 H), 7.62 (ddd,  $J$  = 9.0, 8.0, 1.5 Hz, 1 H), 7.61 (dd,  $J$  = 8.0, 2.0 Hz, 1 H), 7.42-7.41 (comp, 2 H), 7.32 (app t,  $J$  = 8.0 Hz, 1 H), 7.17 (s, 1 H), 7.09 (ddd,  $J$  = 7.5, 2.5, 1.5, 1.0 Hz, 1 H), 7.04-7.03 (m, 1 H), 6.88 (ddd,  $J$  = 8.0, 2.5, 0.5 Hz, 1 H), 5.85 (s, 1 H), 4.02 (ddd,  $J$  = 12.5, 6.0, 6.0 Hz, 1 H), 3.94-3.89 (m, 1 H), 3.83

(s, 3 H), 3.05 (app t,  $J = 6.0$  Hz, 2 H);  $^{13}\text{C}$  NMR (125 MHz)  $\delta$  166.2, 160.1, 141.3, 140.3, 140.2, 135.2, 133.0, 132.7, 132.2, 130.3, 129.9, 129.8, 129.4, 129.3, 127.6, 127.5, 126.1, 122.7, 119.4, 113.0, 112.8, 55.3, 49.8, 40.4, 28.3; IR (neat) 2935, 1637, 1606, 1486, 1401, 1227, 785, 760, 734, 699  $\text{cm}^{-1}$ ; mass spectrum (CI)  $m/z$  409.1669 [ $\text{C}_{25}\text{H}_{21}\text{N}_4\text{O}_2$  (M+1) requires 409.1665].

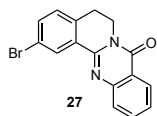

**2-Bromo-5H-isoquinolino[1,2-b]quinazolin-8(6H)-one (27).** A solution of *o*-azidobenzoic acid (214 mg, 1.3 mmol) in thionyl chloride (6.52 g, 4.0 mL, 55 mmol) was heated under reflux for 3 h. The cooled solution was concentrated under reduced pressure, and the residue was azeotroped with anhydrous benzene ( $3 \times 4$  mL).<sup>8</sup> The yellow oil was dissolved in 1,2-dichloroethane (2.0 mL) and added to dihydroisoquinoline **1** (250 mg, 1.19 mmol) in 1,2-dichloroethane (5.0 mL). The yellow solution was heated under reflux for 1.5 h. After cooling to room temperature, the reaction was partitioned between saturated aqueous  $\text{NaHCO}_3$  (10 mL) and  $\text{CH}_2\text{Cl}_2$  (10 mL). The layers were separated, and the aqueous layer was extracted with  $\text{CH}_2\text{Cl}_2$  ( $3 \times 10$  mL). The combined organic layers were dried ( $\text{Na}_2\text{SO}_4$ ) and concentrated under reduced pressure. The resultant yellow solid was purified by flash chromatography eluting with  $\text{CH}_2\text{Cl}_2$  to give 242 mg (62%) of **27** as a yellow solid: mp 184-186  $^\circ\text{C}$ ;  $^1\text{H}$  NMR (500 MHz)  $\delta$  8.55 (d,  $J = 2.2$  Hz, 1 H), 8.22 (dt,  $J = 8.0, 1.2$  Hz, 1 H), 7.69-7.68 (comp, 2 H), 7.50 (dd,  $J = 8.0, 1.9$  Hz, 1 H), 7.40 (ddd,  $J = 8.0, 4.4, 3.6$  Hz, 1 H), 7.09 (d,  $J = 8.0$  Hz, 1 H), 4.32 (t,  $J = 6.3$  Hz, 2 H), 2.98 (t,  $J = 6.3$  Hz, 2 H);  $^{13}\text{C}$  NMR (125 MHz)  $\delta$  160.5, 146.9, 146.5, 134.7, 133.5, 133.4, 130.3, 129.7, 128.1, 126.7, 125.9, 125.8, 120.4, 119.8, 38.4, 26.0; IR (neat) 3458, 1675, 1556, 1473, 1423, 1239, 772, 693  $\text{cm}^{-1}$ ; mass spectrum (CI)  $m/z$  327.0135 [ $\text{C}_{16}\text{H}_{12}\text{N}_2\text{O}^{79}\text{Br}$  (M+1) requires 327.0133].

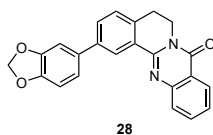

**2-(Benzo[*d*][1,3]dioxol-5-yl)-5H-isoquinolino[1,2-*b*]quinazolin-8(6H)-one (28).** A mixture of quinazolone **27** (50 mg, 0.15 mmol), cesium carbonate (100 mg, 0.31 mmol), benzo[*d*][1,3]dioxol-5-ylboronic acid (51 mg, 0.31 mmol), and bis(tri-*tert*-butylphosphine)-

palladium(0) (0.8 mg, 0.002 mmol) in degassed 1,4-dioxane (0.8 mL) was heated at 90 °C for 3 h. The reaction was cooled to room temperature and filtered through a pad of celite. The filtrate was concentrated under reduced pressure and purified by flash chromatography eluting with CH<sub>2</sub>Cl<sub>2</sub> to provide 53 mg (94%) of quinazolone **28** as a cream colored solid: mp 220-221 °C; <sup>1</sup>H NMR (500 MHz) δ 8.65 (d, *J* = 1.5 Hz, 1 H), 8.33 (dd, *J* = 8.0, 1.0 Hz, 1 H), 7.81-7.75 (comp, 2 H), 7.63 (dd, *J* = 8.0, 1.5 Hz, 1 H), 7.47 (ddd, *J* = 8.0, 7.0, 1.5 Hz, 1 H), 7.33 (d, *J* = 8.0 Hz, 1 H), 7.18-7.16 (comp, 2 H), 6.92 (d, *J* = 7.5 Hz, 1 H), 6.03 (s, 2 H), 4.44 (t, *J* = 6.5 Hz, 2 H), 3.13 (t, *J* = 6.5 Hz, 2 H); <sup>13</sup>C NMR (125 MHz) δ 161.8, 149.3, 148.3, 147.8, 147.4, 140.5, 135.6, 134.6, 134.3, 130.1, 129.9, 128.0, 127.7, 126.9, 126.6, 126.3, 120.83, 120.78, 108.7, 107.7, 101.3, 39.7, 27.2; IR (neat) 2896, 1669, 1477, 1239, 1038, 773 cm<sup>-1</sup>; mass spectrum (CI) *m/z* 369.1239 [C<sub>23</sub>H<sub>17</sub>N<sub>2</sub>O<sub>3</sub> (M+1) requires 369.1239].

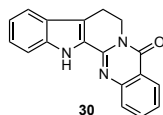

**Rutaecarpine (30).** *N,N*-diisopropylethylamine (34 mg, 46 μL, 0.27 mmol) was added to a suspension of **29** (50 mg, 0.24 mmol) in CH<sub>2</sub>Cl<sub>2</sub> (2 mL) at room temperature. *o*-azidobenzoyl chloride (57 mg, 0.32 mmol) in CH<sub>2</sub>Cl<sub>2</sub> (2 mL) was added, and the reaction was stirred for 48 h at room temperature. The reaction was partitioned between CH<sub>2</sub>Cl<sub>2</sub> (15 mL) and saturated aqueous NaHCO<sub>3</sub> (15 mL). The layers were separated, and the aqueous layer was extracted with CH<sub>2</sub>Cl<sub>2</sub> (2 × 15 mL). The combined organic layers were dried (Na<sub>2</sub>SO<sub>4</sub>), filtered, and concentrated under reduced pressure. The resultant yellow solid was purified by flash column chromatography eluting with CH<sub>2</sub>Cl<sub>2</sub>/EtOAc (99 : 1 → 95 : 5 → 9 : 1) to give 40 mg of **30** (58%) as a tan solid: mp 256-257 °C (Lit. = 256-257 °C); <sup>1</sup>H NMR (400 MHz) δ 9.56 (br, 1 H), 8.33 (dd, *J* = 8.0, 1.2 Hz, 1 H), 7.70 (ddd, *J* = 8.4, 6.8, 1.6 Hz, 1 H), 7.66-7.62 (comp, 2 H), 7.42 (ddd, *J* = 8.0, 6.8, 1.2 Hz, 1 H), 7.36-7.28 (comp, 2 H), 7.17 (ddd, *J* = 7.6, 6.4, 1.2 Hz, 1 H), 4.60 (t, *J* = 7.2 Hz, 2 H), 3.24 (t, *J* = 7.2 Hz, 2 H); <sup>13</sup>C NMR (100 MHz) δ 161.6, 147.5, 145.0, 138.3, 134.4, 127.2, 127.1, 126.6, 126.2, 125.6, 125.5, 121.2, 120.6, 120.1, 118.4, 112.1, 41.1, 19.7; IR (neat) 3342, 1652, 1603, 1327, 729; mass spectrum (CI) *m/z* 288.1129 [C<sub>18</sub>H<sub>14</sub>N<sub>3</sub>O (M+1) requires 288.1137].

## References

1. Still, W. C.; Kahn, M.; Mitra, A. *J. Org. Chem.* **1978**, *43*, 2923-2925.
2. Jung, M. E.; Blum, R. B. *Tetrahedron Lett.* **1977**, *18*, 3791-3794.
3. For the crystal structure of **4**, see the CIF file in the supporting information
4. Slougui, N.; Rousseau, G. *Synth. Commun.* **1987**, *17*, 1-11.
5. King, A. O.; Negishi, E.; Villani, F. J., Jr.; Silveira, A., Jr. *J. Org. Chem.* **1978**, *43*, 358-360.
6. Gilchrist, T. L.; Pearson, D. P. J. *J. Chem. Soc., Perkin Trans. 1* **1976**, 989-993.
7. Raminelli, C; Gargalaka, J., Jr.; Silveira, C. C.; Comasseto, J. V. *Tetrahedron* **2007**, *63*, 8801-8809.
8. Cledera, P.; Avendaño, C.; Menéndez, J. C. *Tetrahedron* **1998**, *54*, 12349-12360.
9. Kametani, T.; Ohsawa, T.; Ihara, M.; Fukumoto, K. *Chem. Pharm. Bull.* **1978**, *26*, 1922-1926.

600 MHz nmrox

BAG-01-136

expi Proton

| SAMPLE              | temp    | SPECIAL |
|---------------------|---------|---------|
| date Jun 4 2009     | 27.0    |         |
| time 10:00          | 20      |         |
| file                | 0.008   |         |
| ACQUISITION exp hst | 11.600  |         |
| sw 9615.4 pw90      | 10.000  |         |
| at 4.000 alfa       |         |         |
| np 76924 11         |         |         |
| fb 4000             |         |         |
| us 32               |         |         |
| sd 40               |         |         |
| di 2.000 hs         |         |         |
| nt 64               |         |         |
| ct                  |         |         |
| TRANSMITTER         | 64      | fn      |
| in                  | 599.753 | sp      |
| stfrq               | 393.6   | wp1     |
| tdwr                | 1.938   | rfp     |
| pm                  |         |         |
| DECOUPLER           | C13     | tp      |
| dn                  | 0       |         |
| dof                 |         |         |
| dmm                 | nm      | wc      |
| dmm                 | C       | sc      |
| dpwr                | 32      | vs      |
| dmf                 | 35088   | vn      |
| dl                  |         | at      |
| cdc                 | ph      |         |
| PROCESSING          | 0.10    | nm      |
| DISPLAY             | 262144  |         |
| 299.8               |         |         |
| 1139.0              |         |         |
| 140.1               |         |         |
| 9.8                 |         |         |
| 250                 |         |         |
| 179                 |         |         |
| 12                  |         |         |

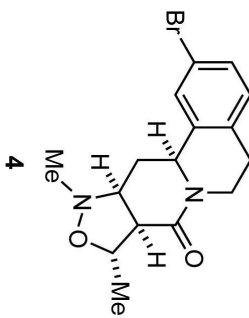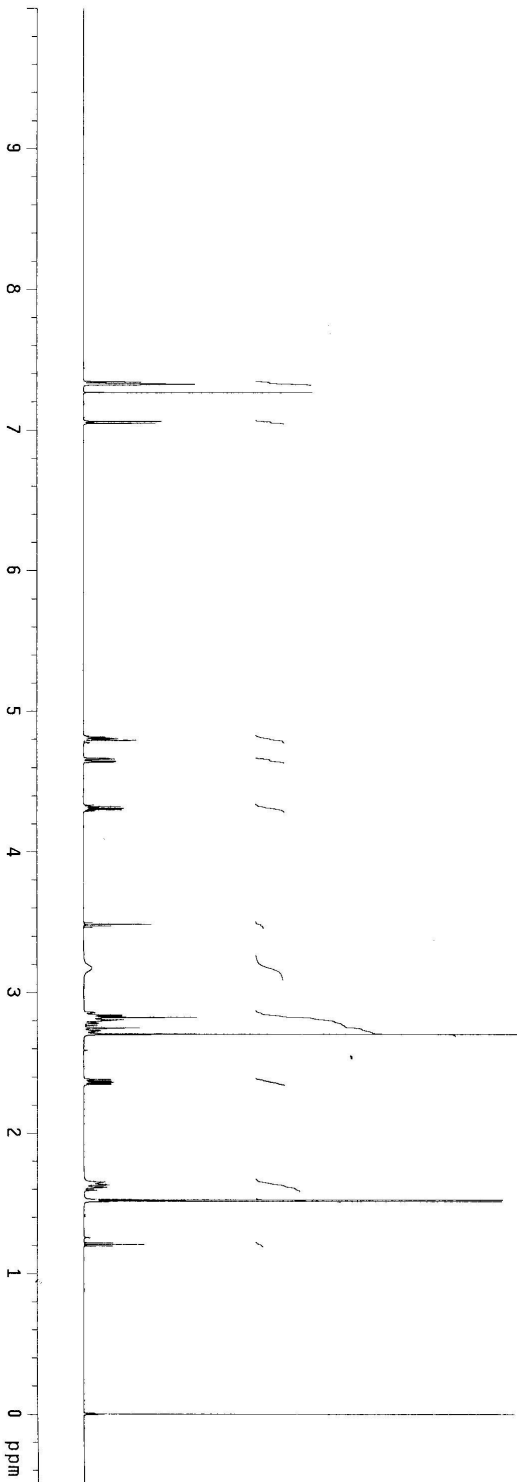



600 MHz mroox

BAG-01-136

exp4 Carbon

|         |           |      |          |
|---------|-----------|------|----------|
| date    | 4 2009    | temp | 27.0     |
| solvent | cdcl3     | gain | 30       |
| f1      | cdcl3     | hst  | 0.008    |
| sw      | 36764.7   | pw90 | 7.800    |
| at      | 2.000     | alfr | 10.000   |
| np      | 147058    | 11   | n        |
| fb      | 17000     | 11   | n        |
| bs      | 64        | 1n   | n        |
| dl      | 2.000     | hs   | y        |
| ct      | 2000      | hs   | n        |
| tn      | 2000      | hs   | n        |
| tr      | 2000      | hs   | n        |
| stfrq   | 150.823   | fn   | not used |
| tof     | 1542.3    | sp   | DISPLAY  |
| tpwr    | 1.58      | wp1  | -754.2   |
| pw      | 2.600     | fft  | 30915.3  |
| dn      | DECOUPLER | ftf  | 2591.6   |
| dn      | H1        | ftp  | 133.6    |
| dof     | 0         | lp   | 14.3     |
| dm      | YYY       | pl   | PLOT     |
| dmm     | W         | wc   | 250      |
| dpwr    | 46        | sc   | 0        |
| dmp     | 15337     | vs   | 69144    |
| at      | cdc       | ph   | 88       |

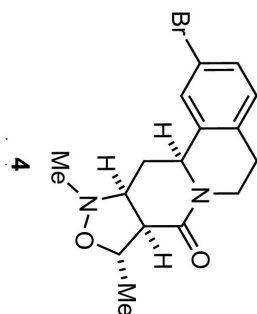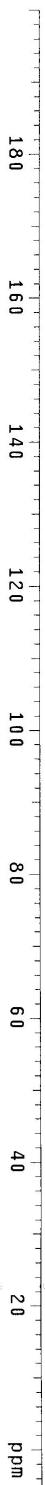

600 MHz nmrox

KK187

exptl Proton

|             |            |       |                 |
|-------------|------------|-------|-----------------|
| date        | Nov 1 2010 | temp  | 25.0            |
| solvent     | cdcl3      | gain  | 30              |
| file        | exp        | spin  | 20              |
| ACQUISITION | exp        | hs    | 0.008           |
| sw          | 3615.4     | pw    | 11              |
| at          | 7.622      | attra | 10.000          |
| rf          | 4000       | fltr  | n               |
| bs          | 32         | in    | n               |
| d1          | 2.000      | dp    | y               |
| nt          | 64         | hs    | n               |
| ct          | 64         | hs    | n               |
| TRANSMITTER | H1         | fb    | PROCESSING 0.10 |
| th          | 599.753    | fn    | 282144          |
| sf          | 599.7      | sp    | DISPLAY -299.9  |
| sf          | 61         | wp    | 6297.3          |
| tpwr        | 1.938      | rf1   | 1200.4          |
| pw          | 1.938      | rfp   | 46.9            |
| DECOUPLER   | C13        | tp    | 12.6            |
| dn          | 0          | tp    | 0               |
| dof         | 0          | tp    | 0               |
| dm          | nmn        | PLOT  | 250             |
| dmm         | 37         | wc    | 0               |
| dmr         | 37         | sc    | 0               |
| dpwr        | 35088      | vs    | 701             |
| dmp         |            | th    | 12              |
| ai          | cdc        | ph    |                 |

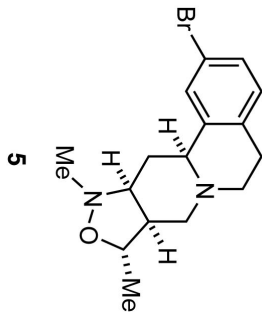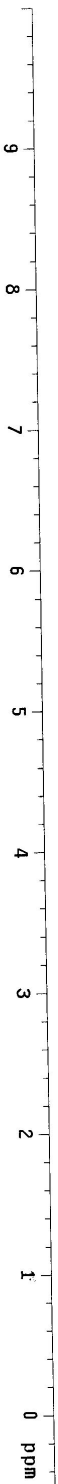

600 MHz nmrox

KK167

exp4 Carbon

|             |            |            |          |
|-------------|------------|------------|----------|
| date        | Nov 1 2010 | temp       | 25.0     |
| solvent     | cdcl3      | gain       | 40       |
| file        | cdcl3      | spin       | 20       |
| exp         | exp        | hst        | 0.008    |
| ACQUISITION |            | pw90       | 7.800    |
| sw          | 4032.6     | ai/a       | 10.000   |
| at          | 2.000      | fl         | n        |
| fp          | 17000      | in         | n        |
| bs          | 64         | dp         | hs       |
| nt          | 6000       | hs         | Y        |
| ct          | 6000       | PROCESsing | 0.50     |
| TRANSMITTER | Q13        | fn         | not used |
| ln          | 150        | SP         | -754.3   |
| sfreq       | 22982      | WD         | 30915.4  |
| tpwr        | 58         | FF1        | 3568.6   |
| pw          | 2.600      | FFP        | 133.8    |
| DECOUPLER   | H1         | TP         | -0.0     |
| dn          | 0          | PLOT       | 250      |
| dof         | YYY        | WC         | 49       |
| dm          | W          | VS         | 26735    |
| dmm         | 49         | th         | 6        |
| dmr         | 15337      | ai         | cdc      |
| dmf         |            | ph         |          |

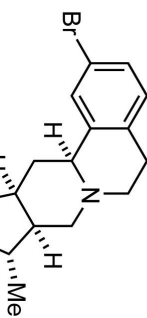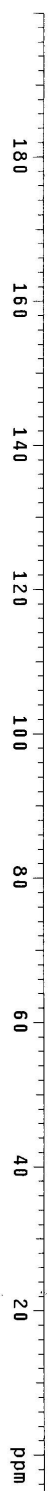

KK240p  
 1s0q.mqph  
 Archive directory:  
 Sample directory:  
 Pulse Sequence: s2pu1  
 Solvent: cdcl3  
 Ambient temperature  
 File: KK240p\_s2pu1\_H1  
 INOVA-500 "nmr1roy"  
 Relax delay 2.000 sec  
 Pulse 30.0 degrees  
 Acq. time 4.000 sec  
 Width 6410.3 Hz  
 NS 2048  
 DS 4  
 SFO 400.1363980047115 MHz  
 DATA PROCESSING  
 Line broadening 0.1 Hz  
 FT size 65536  
 Total time 3 min, 24 sec

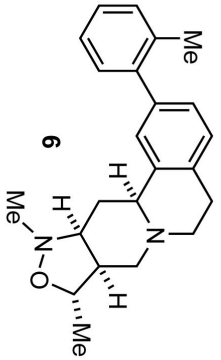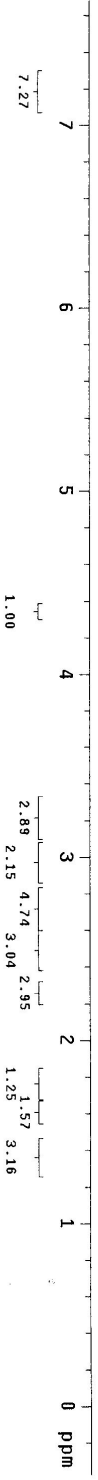

KK240

Archive directory:  
Sample directory:  
Pulse Sequence: szpul  
Solvent: cdcl3  
Acquisition Date:  
User: 1-14-87  
File: KK240.szpul C13  
INOVA-500 "nmr1froy"

Relax. delay 2.000 sec  
Pulse 30.0 degrees  
Acq. time 1.300 sec  
Width 24509.8 Hz  
1000 F repetitions 5309747 MHZ  
OSCILL C13 399.5007105 MHZ  
SAMPLE C13 399.5007105 MHZ  
Power 44 dB  
continously on  
VALTZ-16 modulated  
DATA PROCESSING  
Line broadening 2.0 Hz  
F1 size 65536  
Total time 55 min, 9 sec

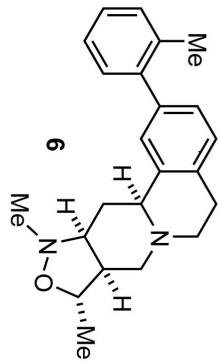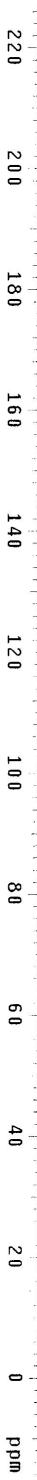

KK2E1

Archive directory:  
Sample directory:  
Pulse Sequence: s2put  
Solvent: cdcl3  
Ambient temperature  
File: KK2E1\_s2put\_H1  
INOVA-500 "nmr1roy"

Relax. delay 2.000 sec  
Pulse 30.0 degrees  
Acq. time 4.000 sec  
Width 6410.3 Hz  
SFO 500.136199 MHz  
OBSREP1110ns99.8047115 MHz  
DATA PROCESSING  
Line broadening 0.1 Hz  
FT size 65536  
Total time 3 min, 24 sec

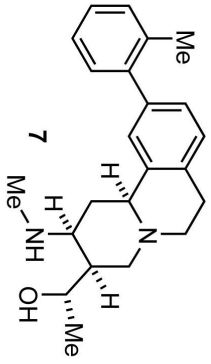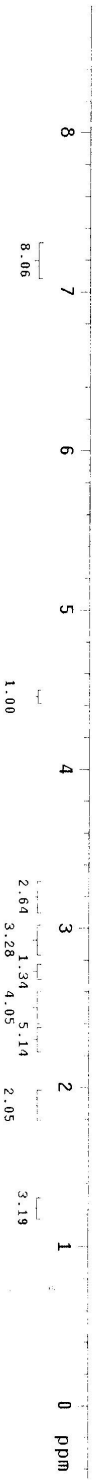

KK261  
 Archive directory:  
 Sample directory:  
 Pulse Sequence: s2pu1  
 Solvent: cdCl3  
 Ambient temperature  
 User: 1-14-87  
 File: KK261\_s2pu1\_C13  
 INOVA-500 "nmrfity"

Relax. delay 2.000 sec  
 Pulse 30.0 degrees  
 Acq. time 1.300 sec  
 F100 100.626130 MHz  
 FID0H 243091.000 Hz  
 OBSERVE C13 100.626130 MHz  
 DECOUPLE H1 399.8067105 MHz  
 Power 44 db  
 continuously on  
 WALTZ-16 modulated  
 DATA PROCESSING  
 Line processing 2.0 Hz  
 File size 6335  
 Total time 35 min, 9 sec

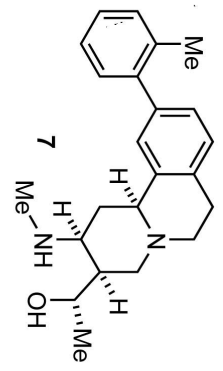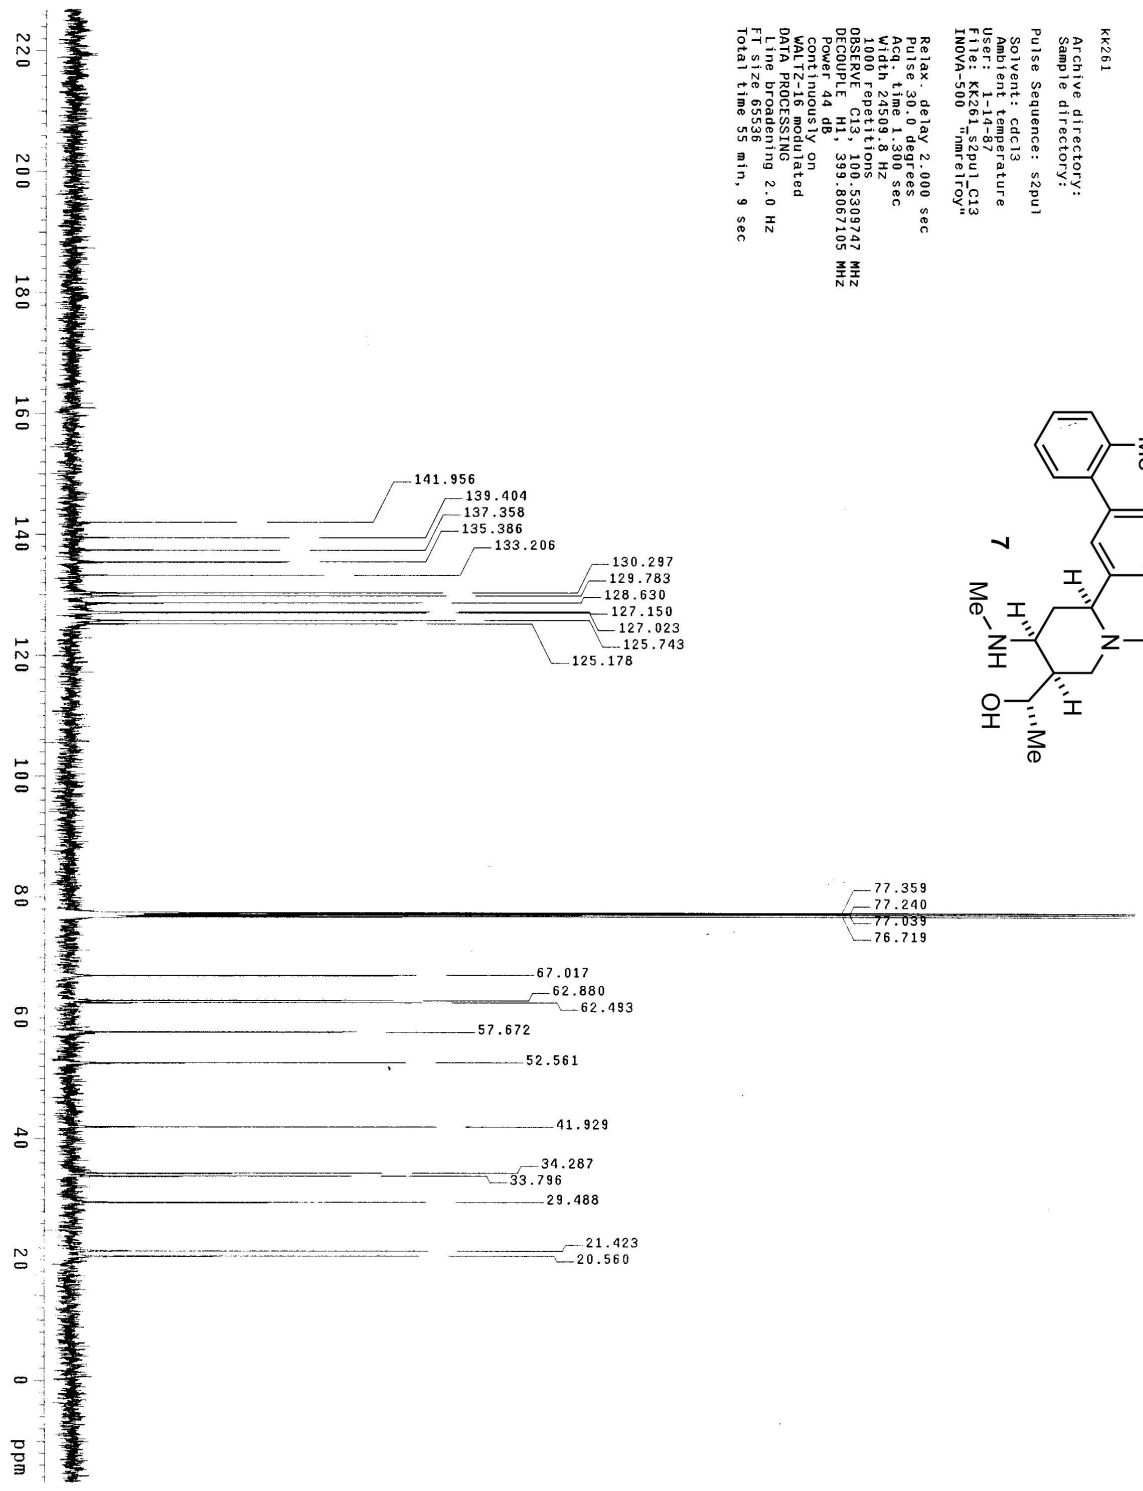

KK265  
 furan-amide  
 Archive directory:  
 Sample directory:  
 Pulse Sequence: s2pul  
 Solvent: cdcl3  
 Ambient temperature  
 File: KK265\_s2pul\_H1  
 INOVA-500 "nmrfroy"  
 Relax. delay 2.000 sec  
 Pulse 30.0 degrees  
 Acq. time 4.000 sec  
 Width 6410.3 Hz  
 Observed 1H 399.8047113 MHz  
 DATA PROCESSING  
 Line broadening 0.1 Hz  
 FI size 65536  
 Total time 3 min, 24 sec

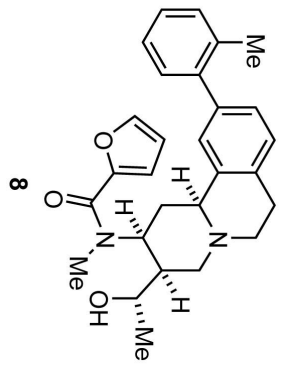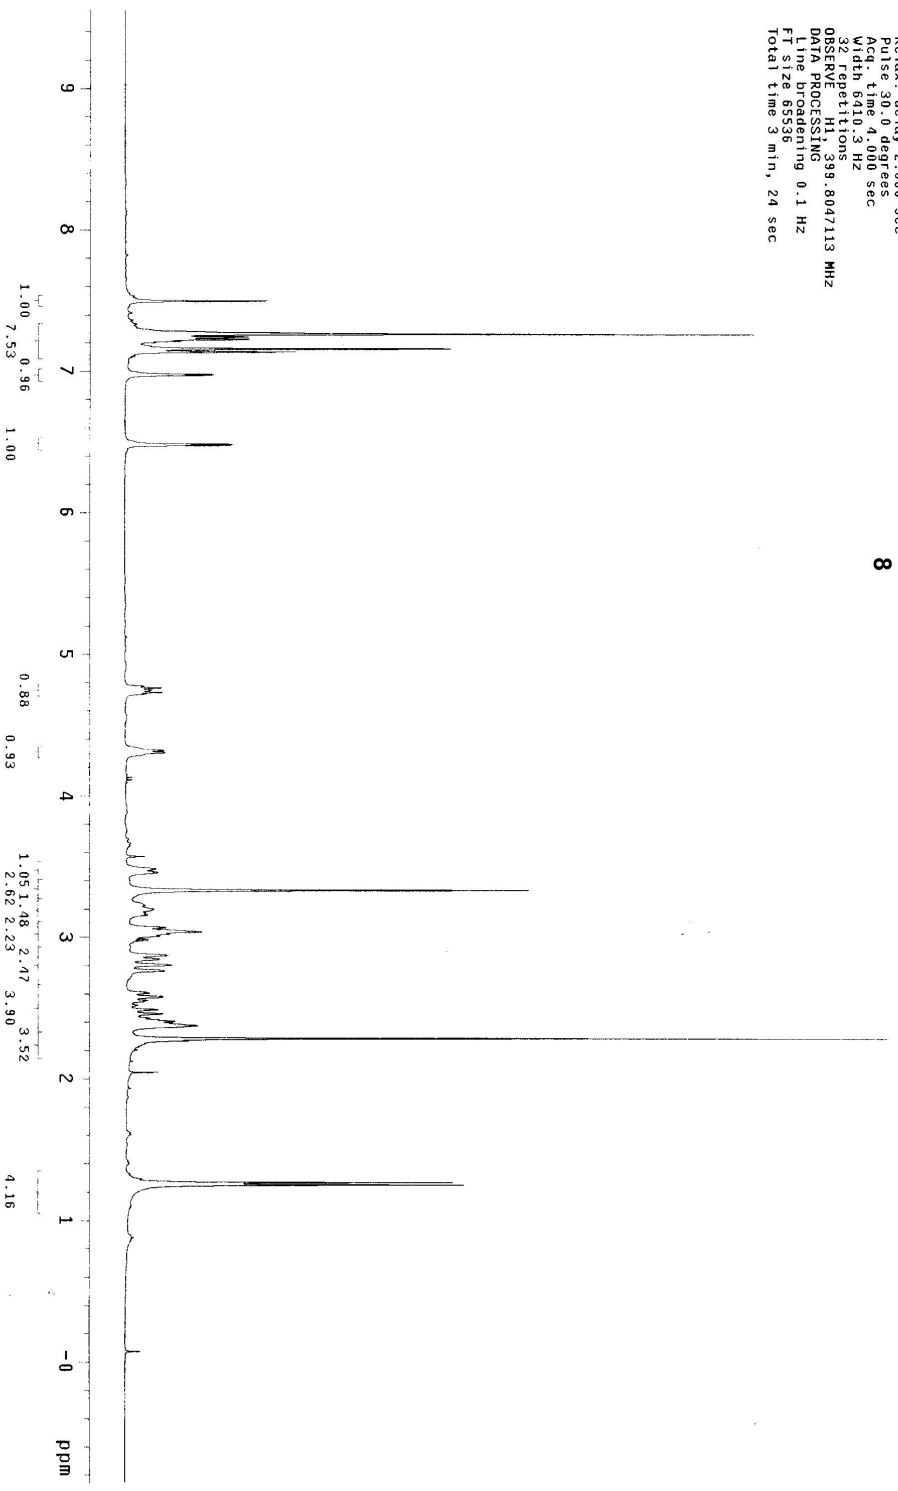



KK265  
 furan-amide  
 Archive directory:  
 Sample directory:  
 Pulse Sequence: s2pul  
 Solvent: cdcl3  
 Ambient temperature  
 User: 1-14-87  
 File: KK265\_s2pul\_C13  
 INOVA-500 "nmrfroy"  
 Relax. delay 2.000 sec  
 Pulse 30.0 degrees  
 Acq. time 4.300 sec  
 No. of scans 1000  
 OBSERVE C13 100.5309747 MHz  
 DECOUPLE H1 399.8057105 MHz  
 Power 44 dB  
 continuously on  
 WALTZ-16 modulated  
 DATA PROCESSING  
 Line broadening 2.0 Hz  
 File ZPP000002  
 Total time 55 min, 9 sec

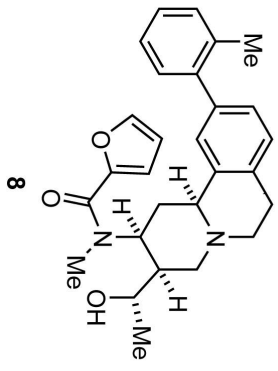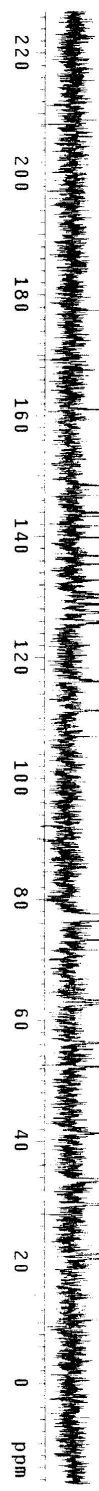

600 MHz nmrox  
BAQ-2-299

expt1 Proton

|             |             |            |         |
|-------------|-------------|------------|---------|
| date        | Mar 7 2011  | temp       | 27.0    |
| solvent     | cdcl3       | gain       | 20      |
| time        | 11:50       | RF         | 0.008   |
| ACQUISITION | exp         | pw90       | 11.500  |
| SW          | 3615.4      | atfa       | 10.000  |
| at          | 4.000       | atfa       | 10.000  |
| mp          | 76924       | flags      | n       |
| fb          | 4000        | in         | n       |
| bs          | 32          | dp         | >       |
| d1          | 2.000       | ds         | n       |
| d2          | 0           | ns         | n       |
| ct          | 64          | PROCESSING | nm      |
| tn          | TRANSMITTER | l1         | 0.10    |
| sfreq       | H1          | fn         | 262144  |
| tof         | 599.753     | sp         | DISPLAY |
| tbw         | 599.7       | wp         | -299.9  |
| pw          | 1.938       | ftf        | 6297.3  |
| DECOUPLER   | C13         | TFD        | 1204.7  |
| dn          | 0           | TP         | 53.9    |
| sd          | 0           | PL         | 11.9    |
| dm          | nmn         | WC         | 250     |
| dmm         | C           | SC         | 0       |
| dpwr        | 37          | VS         | 361     |
| dmf         | 35088       | th         | 2       |
|             | at          | cdc        | ph      |

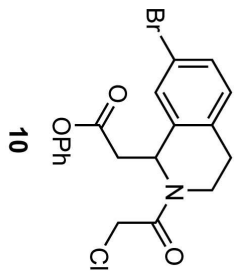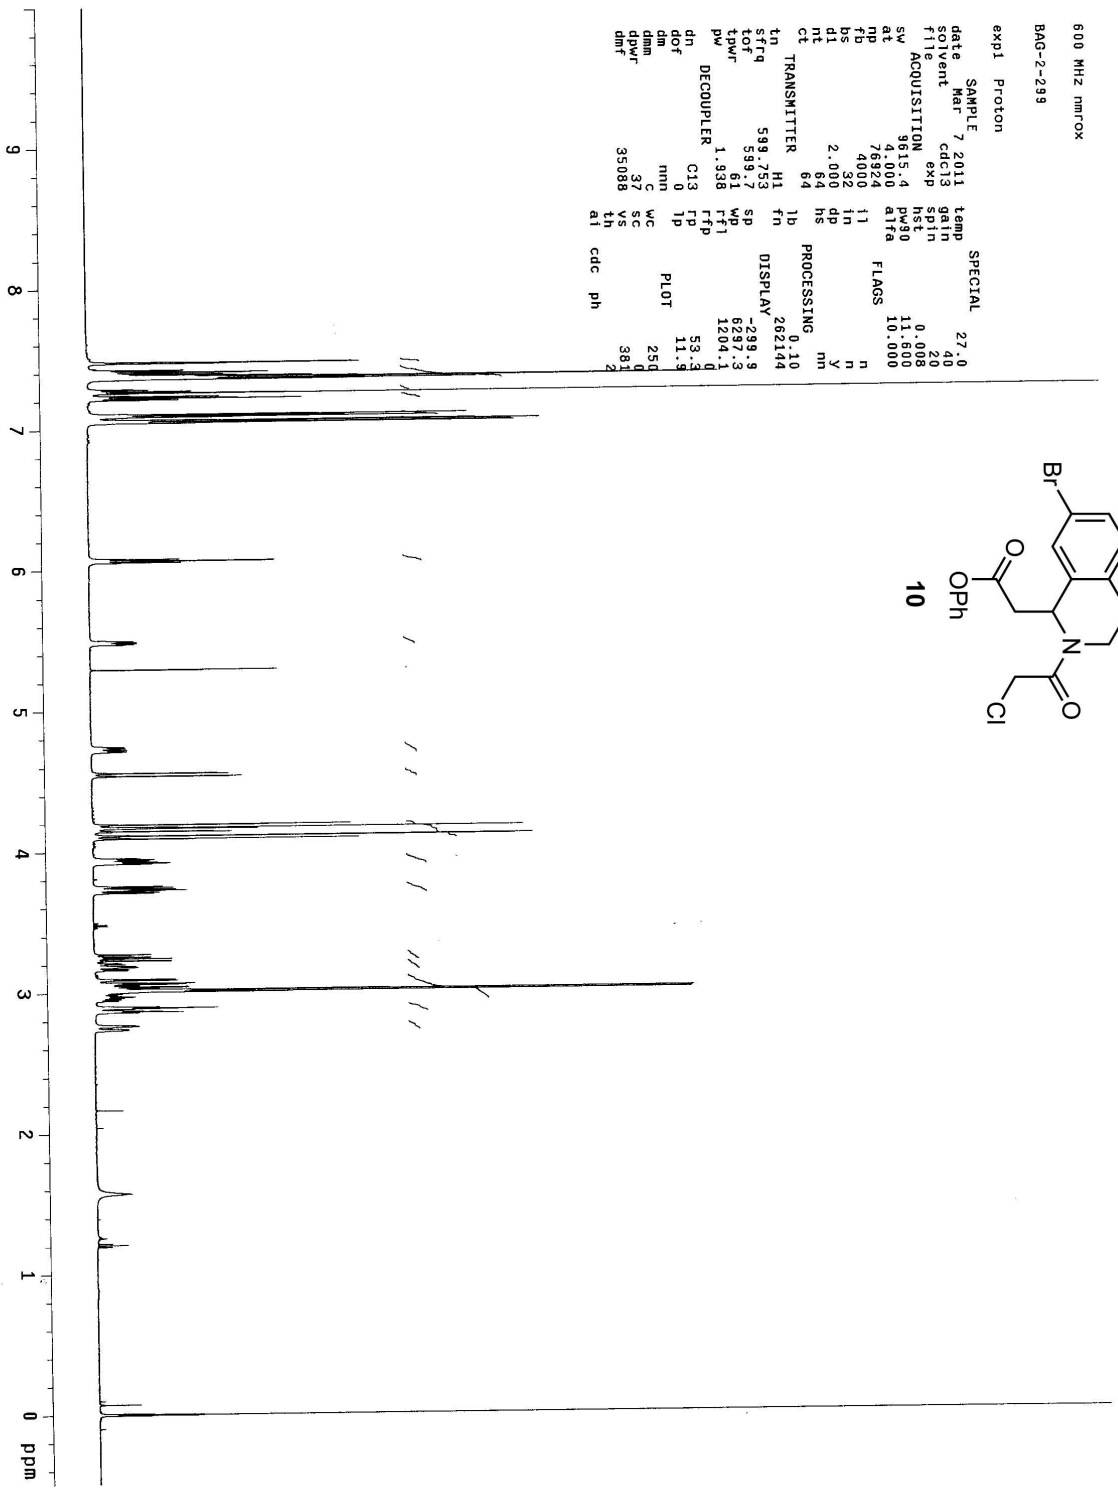

600 MHz nmrox  
BAQ-2-239

exp4 Carbon

|                  |            |       |          |            |
|------------------|------------|-------|----------|------------|
| date             | Mar 7 2011 | temp  | 27.0     | SPECIAL    |
| solvent          | cdcl3      | gain  | 10       |            |
| FILE ACQUISITION | exp        | hst   | 20       |            |
| sw               | 40922.6    | pw90  | 0.008    |            |
| at               | 2.000      | alfa  | 7.800    |            |
| np               | 161290     | flags | 10.000   |            |
| fb               | 17000      |       |          |            |
| bs               | 64         |       |          |            |
| d1               | 2.000      |       |          |            |
| nt               | 2.000      |       |          |            |
| ct               | 6000       |       |          |            |
| TRANSMITTER      | C13        | fb    | fn       | PROCESSING |
| tn               | 150.824    | sp    | not used | nm         |
| sfrq             | 2296.3     | wp    | -754.3   | not used   |
| tpwr             | 58         | fft   | 30915.4  |            |
| pw               | 2.600      | ftf   | 3897.4   |            |
| DECOUPLER        | H1         | ftp   | 298.6    |            |
| dm               | 0          | tp    | 12.5     |            |
| dof              | 0          | pldt  | 250      |            |
| dm               | yyy        | wc    | 0        |            |
| dmm              | 46         | sc    | 0        |            |
| dpvr             | 15337      | vs    | 17675    |            |
| dmf              |            | lh    | 88       |            |
|                  |            | at    | cdc      | ph         |

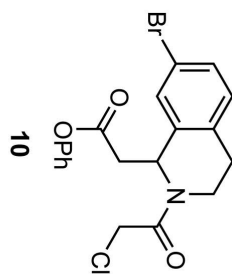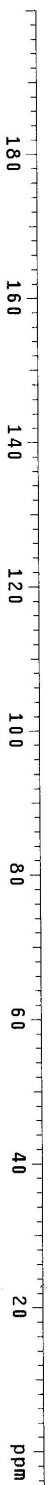

600 MHz nmrox  
BAG-3-27

expt1 Proton

```
date Mar 9 2011 temp 27.0  
solvent cdc13 gain 40  
f1file 9815.4 sp 11.600  
sw 4.000 pw90  
at 76924 atfa 10.000  
np 4000 n  
fb 32 in n  
d1 2.000 dp hs n  
nt 64 n  
ct 64 hs Y  
ct TRANSMITTER 1b fn 0.10  
tn H1 1b fn 262144  
sfrq 599.753 sp DISPLAY -299.9  
tof 599.7 sp 6297.3  
tpwr 61 wf 1199.6  
pw 1.938 rfd  
dn DECOUPLER C13 51.2  
dd 0 tp 11.9  
dco 0 PLOT 290  
dm mn C WC 0  
dmm 37 SC 409  
dpwr 35088 VS 2  
dmf 2  
at cdc ph
```

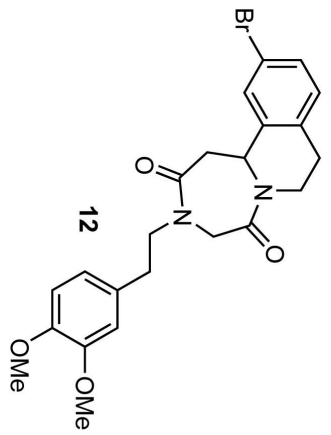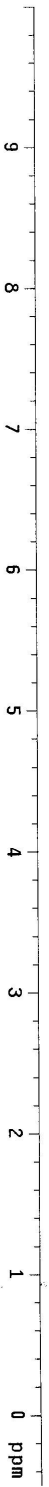

600 MHz nmrox  
BAG-3-27

exp4 Carbon

|           |             |       |      |          |            |
|-----------|-------------|-------|------|----------|------------|
| date      | 9           | 2011  | temp | 27.0     | SPECIAL    |
| solvent   | Mar         | cdc13 | gain | 40       |            |
| file      |             | cdc13 | sp1  | 7.1      |            |
| title     |             | exp   | sp1  | 0.008    |            |
| sw        | 40322.6     | ps30  | atfa | 7.800    |            |
| at        | 2.000       | atfa  | atfa | 10.000   | FLAGS      |
| np        | 181290      |       |      |          |            |
| fb        | 17000       |       |      |          |            |
| bs        | 64          |       |      |          |            |
| d1        | 2.000       |       |      |          |            |
| nt        | 8000        |       |      |          |            |
| ct        | 8000        |       |      |          |            |
| tn        | TRANSMITTER | cl3   | fb   | hs       | PROCESSING |
| sfreq     | 150.824     |       | fn   | not used |            |
| tof       | 2296.3      |       | sp   | DISPLAY  |            |
| tpwr      | 58          |       | wp   | -754.3   |            |
| pw        | 2.600       |       | fff  | 30915.4  |            |
| DECOUPLER | H1          |       | TFP  | 3586.4   |            |
| dn        | H1          |       | TFP  | 296.0    |            |
| dof       | H1          |       | TP   | 12.5     |            |
| dmm       | yyy         |       | PLOT | 250      |            |
| dpwr      | 46          |       | WC   | 0        |            |
| dmt       | 15337       |       | VS   | 40215    |            |
|           |             |       | th   | 88       |            |
|           |             |       | al   | cdc      | ph         |

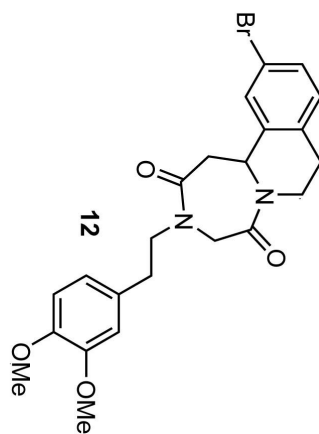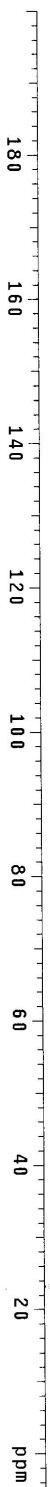

600 MHz nmrox

BAG-3-34

expt1 Proton

```
SAMPLE          SPECIAL
date            14.2011      temp      25.0
solvent         cdcl3        gain       40
file            /home/service- spin      20
/vnmr-sys/data/bag-3-34-h1.fid  hst      0.008
pw90            3.34         a1fa      11.600
ACQUISITION    9615.4       a1fa      10.000
at             7.620        11         n
fb             7.620        11         n
bs             4000         32         Y
d1             2.000        64         hs
nt             64          64         fn
ct TRANSMITTER 64          64         DISPLAY 262144
tp             598.753      H1         SP        6289.9
cf             598.753      H1         RF1       1200.2
tpwr          1.938        61         rfp       45.9
pw            1.938        1p         TP        11.0
DECOUPLER      C13         1p         PLOT
dn             0           WC        250
dof            0           SC        0
dm            mn          37         127
dmw            37         18
dmr            35088      ai         cdc ph    2
```

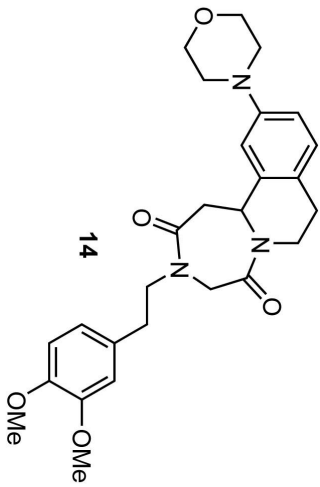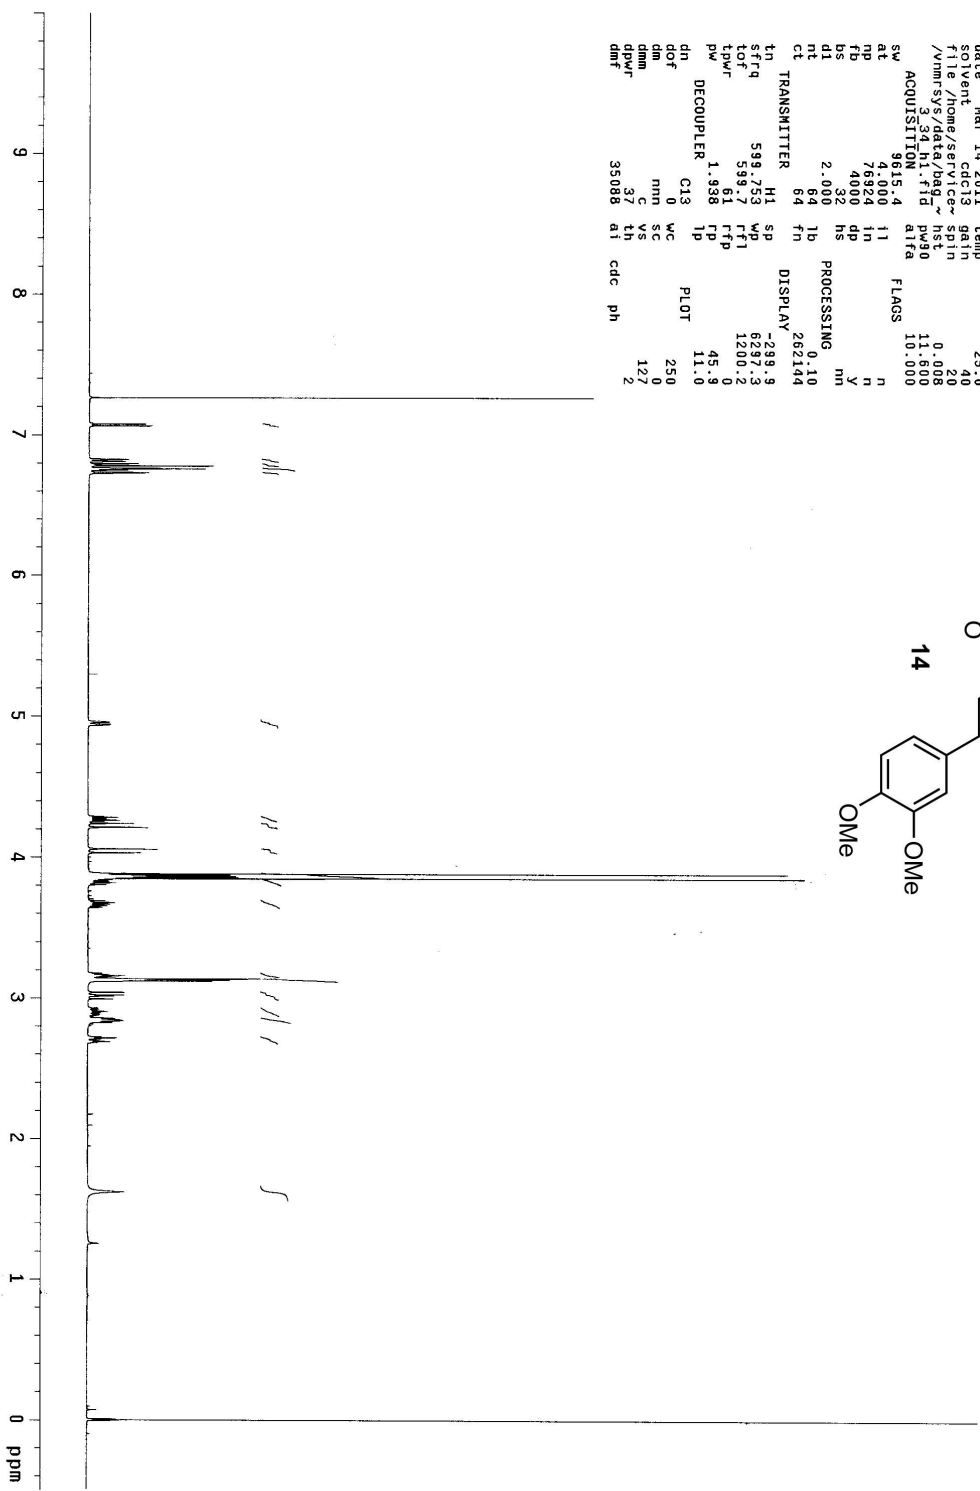

600 MHz nmrox

BAG-3-34

exp4 Carbon

```
SAMPLE  Mar 14 2011  temp 25.00
date      Mar 14 2011  temp 25.00
time      12:40:00    hst  0.008
file      /home/servi/ce- /vnmr-sy/data/bag-3-34_C13.fid
/vnmr-sy/data/bag-3-34_C13.fid
ACQUISITION  40322.6  alfa 10.000
SW          40322.6  11      n
at          2.000   11      n
rf          120.000  11      n
pd          17000    11      n
bs          64       hs      n
d1          2.000   1b      n
nt          6000    1b      n
ct          6000    fn      not used
TRANSMITTER G13      SP      DISPLAY  -754.3
ln          150      G13      SP      30845.4
sf          150.824  WP1     3587.7
td          2.600   58      ffd    289.4
pw          2.600   1p      12.5
DECOUPLER   H1      1p      12.5
dn          0       WC      PLOT    250
dof         0       SC      0
dm          YYY     SC      0
dmm         W       VS      27254
dpr         49     VN      0
dmf         15337  AI      cdc   ph  88
```

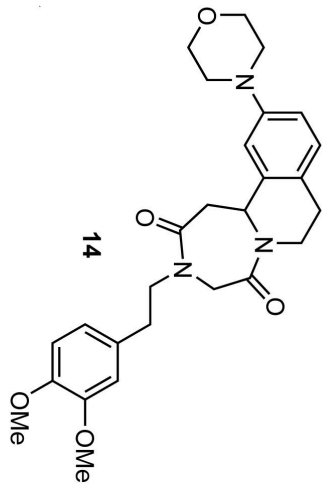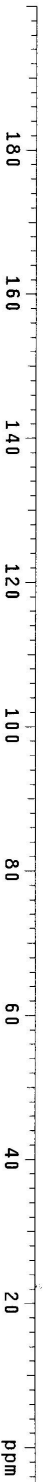

500 MHz nmr 0

baq\_3\_116

expt proton

SAMPLE 7 2011

date 011

solvent cdc13

file exp

ACQUISITION

sw 7997.6

at 4.001

mp 64000

pd 4032

hs 2

ss 2.000

dt 64

nt 64

ct 64

TRNSMITTER

tn H1

sf 499.868

so 499.8

tdwr 57

pw 1.833

DECOUPLER

dn C13

dof 0

dm 0

dmm 0

tdm 0

tdwr 0

dmf 14285

SPECIAL

temp 27.0

gain 30

spin 20

hst 0.008

pw90 11.000

aifa 6.600

FLAGS

n

n

y

m

PROCESSING

0.10

fn

tb

262144

DISPLAY

-250.0

SP

5248.5

RFI

10001.5

0

16319

-119

PLOT

270

10652

ai

cdc

ph

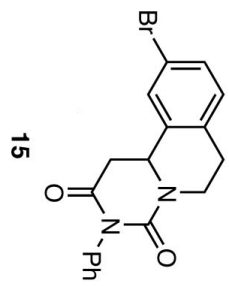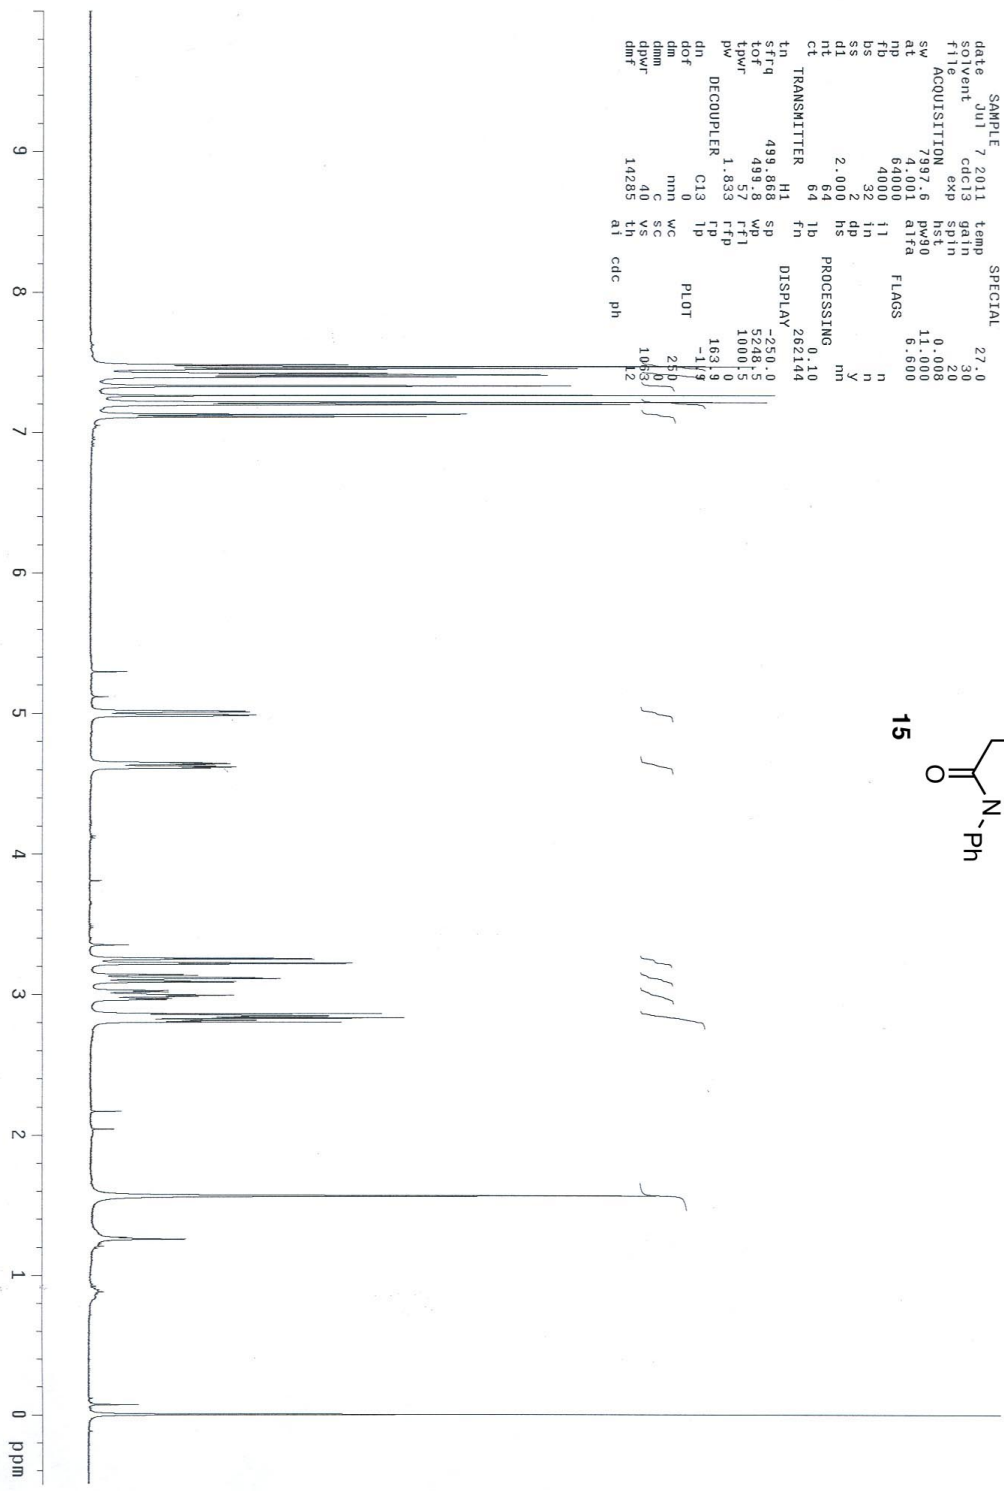



500 MHz nmr 0

bag\_3\_116\_c13

exp4 Carbon

SAMPLE 7 2011 temp 27.0  
date Jul cdc13 gain 50  
solvent cdc13 spn 20  
file exp hst 0.008  
ACQUISITION 30165.9 pw90 9.500  
sw 1.958 alfa 10.000  
at 1.958 alfa 10.000  
rp 11854 i1 n  
rd 17046 i1 n  
d1 2.000 dp Y  
nt 13000 hs n  
ct 13000  
TRANSMITTER G13  
tn 1b fn not used  
strq 125.704 sp DISPLAY-628.7  
tort 125.53 sfp 25766.4  
tomp 1.583 rfi 11593.9  
pw DECOUPLER H1 ffp 9878.2  
dn 0 tp -125.4  
dof 0 tp -193.1  
dmn yyy y WC PLOT 250  
dmv 3 y WC  
dmf 10582 3 y WC  
th ai cdc ph 15603 16

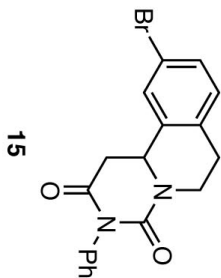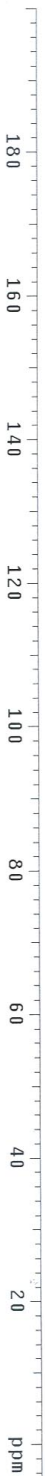

BAG-3-140  
Pulse Sequence: s2pu1  
Solvent: CDCl3  
Ambient temperature  
Mercury-400DB "nmr8"  
Relax. delay 2.000 sec  
Pulse 1b, 2.000 sec  
Pulse 1a, 2.000 sec  
Width 5602.2 Hz  
64 Repetitions  
OBSERVE H1, 400.2669784 MHz  
DATA PROCESSING  
Line Prodding 0.1 Hz  
F1 size 32/88  
Total time 9 min, 21 sec

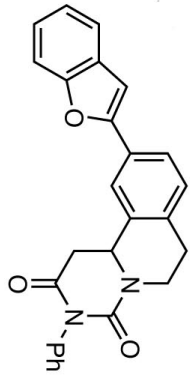

16

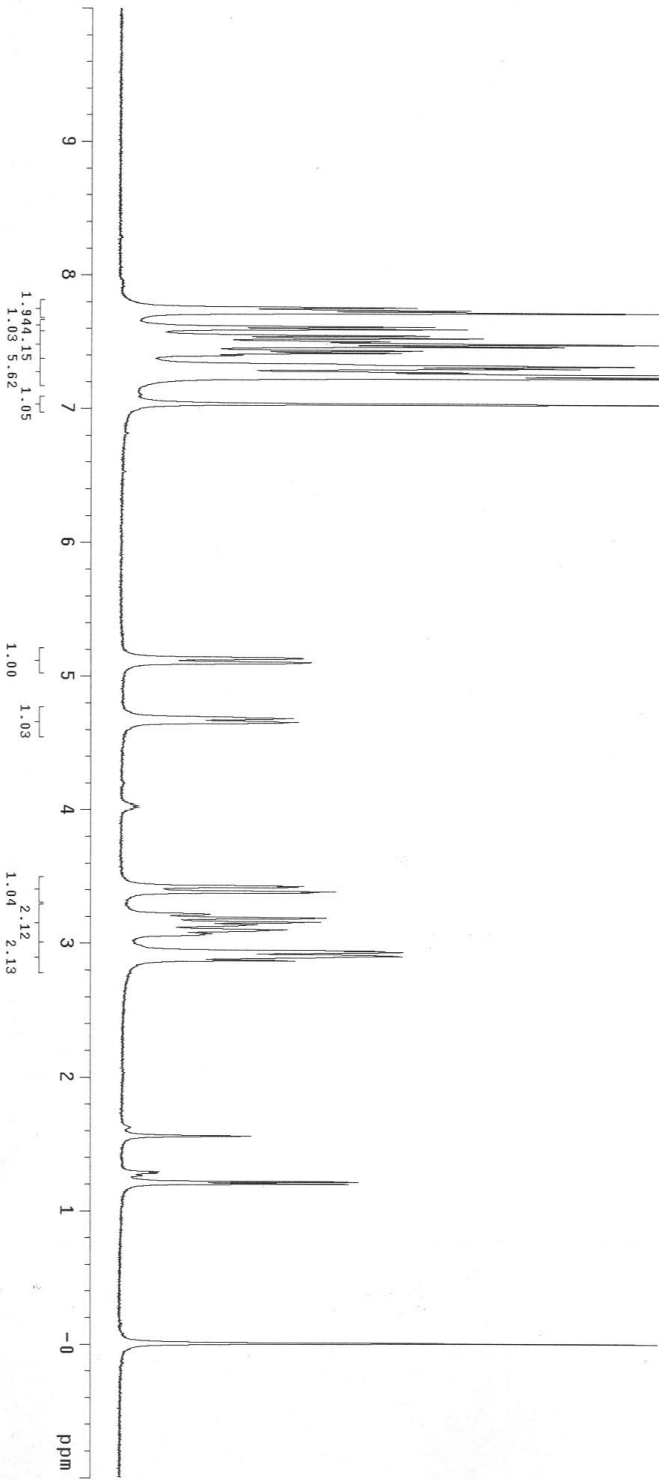

BAG-3-140

Pulse Sequence: s2pu1  
Solvent: CDCl3  
Ambient temperature  
Mercury-400BB "nmr6"

Relax. delay 2.000 sec  
Pulse 22.5 degrees  
Acq. time 1.280 sec  
Width 23188.9 Hz  
Y100 100.628110 Hz  
OBSERVE P13 100.6472130 MHz  
DECUPLE H1 400.2689955 MHz  
Power 38 db  
continuously on  
WALTZ-16 modulated  
DATA PROCESSING  
Line processing 1.0 Hz  
F1 29.99999999  
Total time 9 hr, 53 min, 41 sec

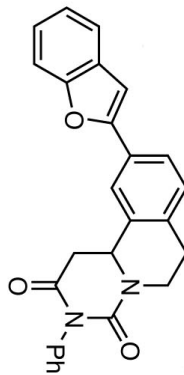

16

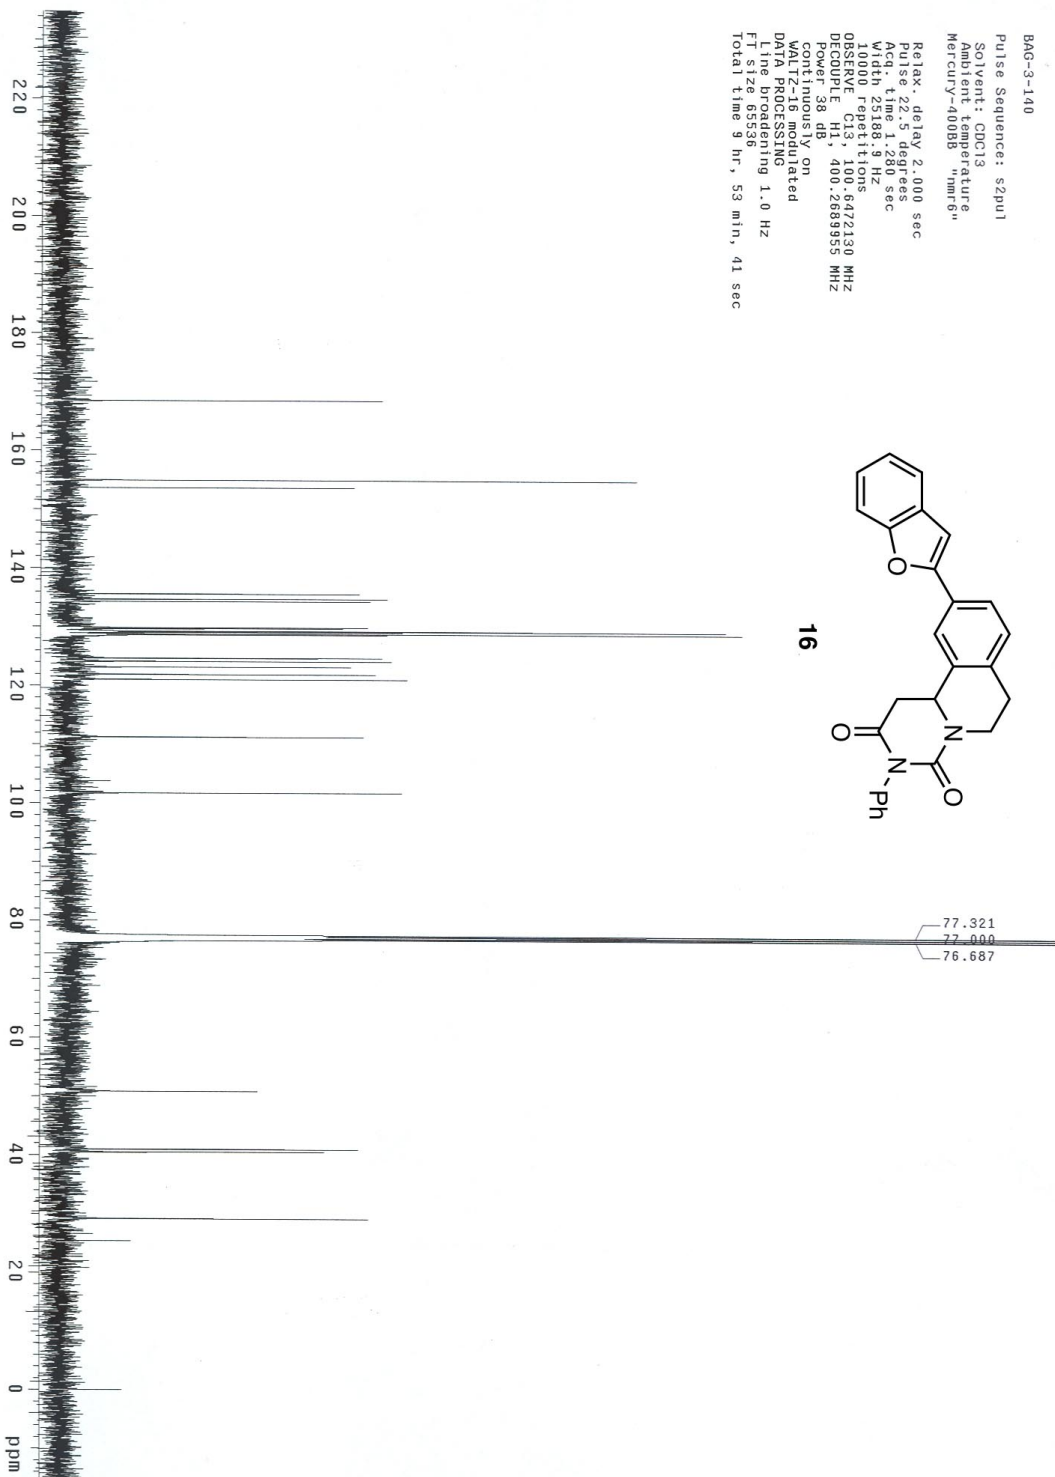

500 MHz mmr0

BAG-2-141

expt1 Proton

|             |         |       |        |            |
|-------------|---------|-------|--------|------------|
| date        | 24 2010 | temp  | 27.0   | SPECIAL    |
| solvent     | cdcl3   | gain  | 30     |            |
| file        | cdcl3   | spn   | 20     |            |
| ACQUISITION | 7997.6  | pw50  | 11.008 |            |
| sw          | 4.001   | ai/fa | 6.600  | FLAGS      |
| at          | 64000   |       |        |            |
| fb          | 4000    |       |        |            |
| fd          | 4000    |       |        |            |
| dt          | 2.000   | dp    |        |            |
| nt          | 64      | hs    |        |            |
| ct          | 64      | hs    |        |            |
| TRANSMITTER | H1      | 1b    | 0.10   | PROCESSING |
| tn          | 499.888 | fn    | 262144 |            |
| strq        | 499.888 | sp    | 250.0  | DISPLAY    |
| tor         | 499.888 | sf    | 5298.5 |            |
| lpr         | 1.833   | rfl   | 996.3  |            |
| pw          | 1.833   | rff   | 173.2  |            |
| DECOUPLER   | C13     | tp    | -5.2   |            |
| dn          | 0       | mn    |        | PLOT       |
| dof         | 0       | wc    | 250    |            |
| dm          | 40      | sc    | 535    |            |
| dms         | 40      | sc    | 535    |            |
| dpr         | 14283   | th    | 12     |            |
| dmi         |         | ai    | cdc ph |            |

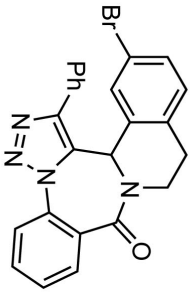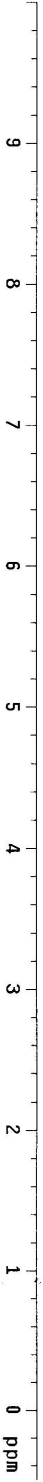

500 MHz nmr 0

BAG-2-141

exp4 Carbon

SAMPLE  
date Sep 24 2010 temp 27.0  
solvent cdc13 gain 40  
file exp hst 20  
ACQUISITION  
sw 32679.7 pw90 9.500  
at 1.858 a1fa 10.000  
np 128000 11  
hs 180 16 in n  
d1 2.000 dp hs y  
nt 8000 hs nm  
ct 0  
TRANSMITTER G13  
tn 125.003 fn 1b not used  
strq 125.003 sp DISPLAY -628.8  
touv 188.53 wp 2576.4  
pw 3.163 rfp 2540.1  
DECOUPLER H1 TP rfp -103.9  
dn 0 tp PLOT -221.5  
dof 0  
dm yyy wc 250  
dmr y  
dmr 3  
dppr v 16884  
dppr 10582  
ai cdc ph 5

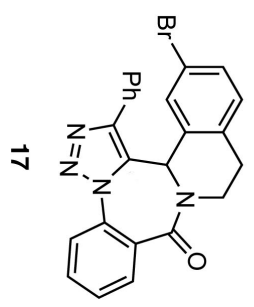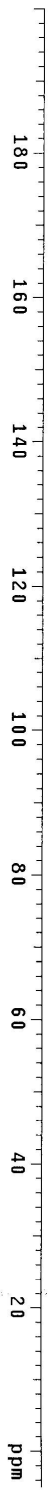

Archive directory:  
Sample directory:  
Pulse Sequence: s2pu1  
Solvent: cdcl3  
Ambient temperature  
File: BAQ-2-179\_s2pu1\_H1  
INOVA-500 "nmrastpro"  
Relax. delay 2.000 sec  
Pulse 30.0 degrees  
Acq. time 4.000 sec  
Width 6410.3 Hz  
32 Repetitions  
0856KVMSCES1399.8047362 MHz  
D1 line broadening 0.1 Hz  
FI size 65536  
Total time 3 min, 24 sec

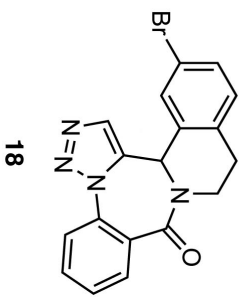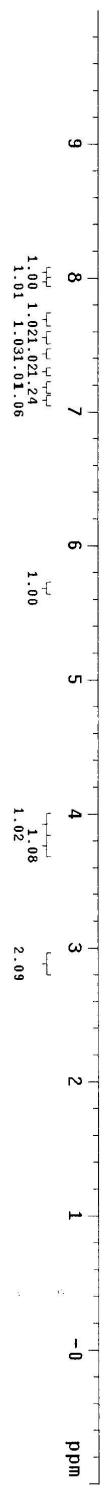

Archive directory:  
Sample directory:  
Pulse Sequence: s2pul  
Solvent: cdcl3  
Ambient temperature  
User: 1-14-87  
File: BMG-2-179\_s2pul\_C13  
NOVA-500 "nmrastrom"  
Relax. delay 2.000 sec  
Pulse 30.0 degrees  
Acq. time 4.300 sec  
N: On 29810 Hz  
2000 "cpd170"  
OBSERVE C13, 100.5309747 MHz  
DECOUPLE H1, 399.8057105 MHz  
Power 44 db  
continously on  
WALTZ-16 modulated  
DATA PROCESSING  
Line broadening 2.0 Hz  
F1 zdet 130  
Total time 1 hr, 50 min, 18 sec

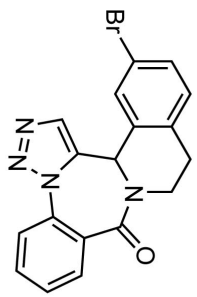

18

77.367  
77.054  
76.734

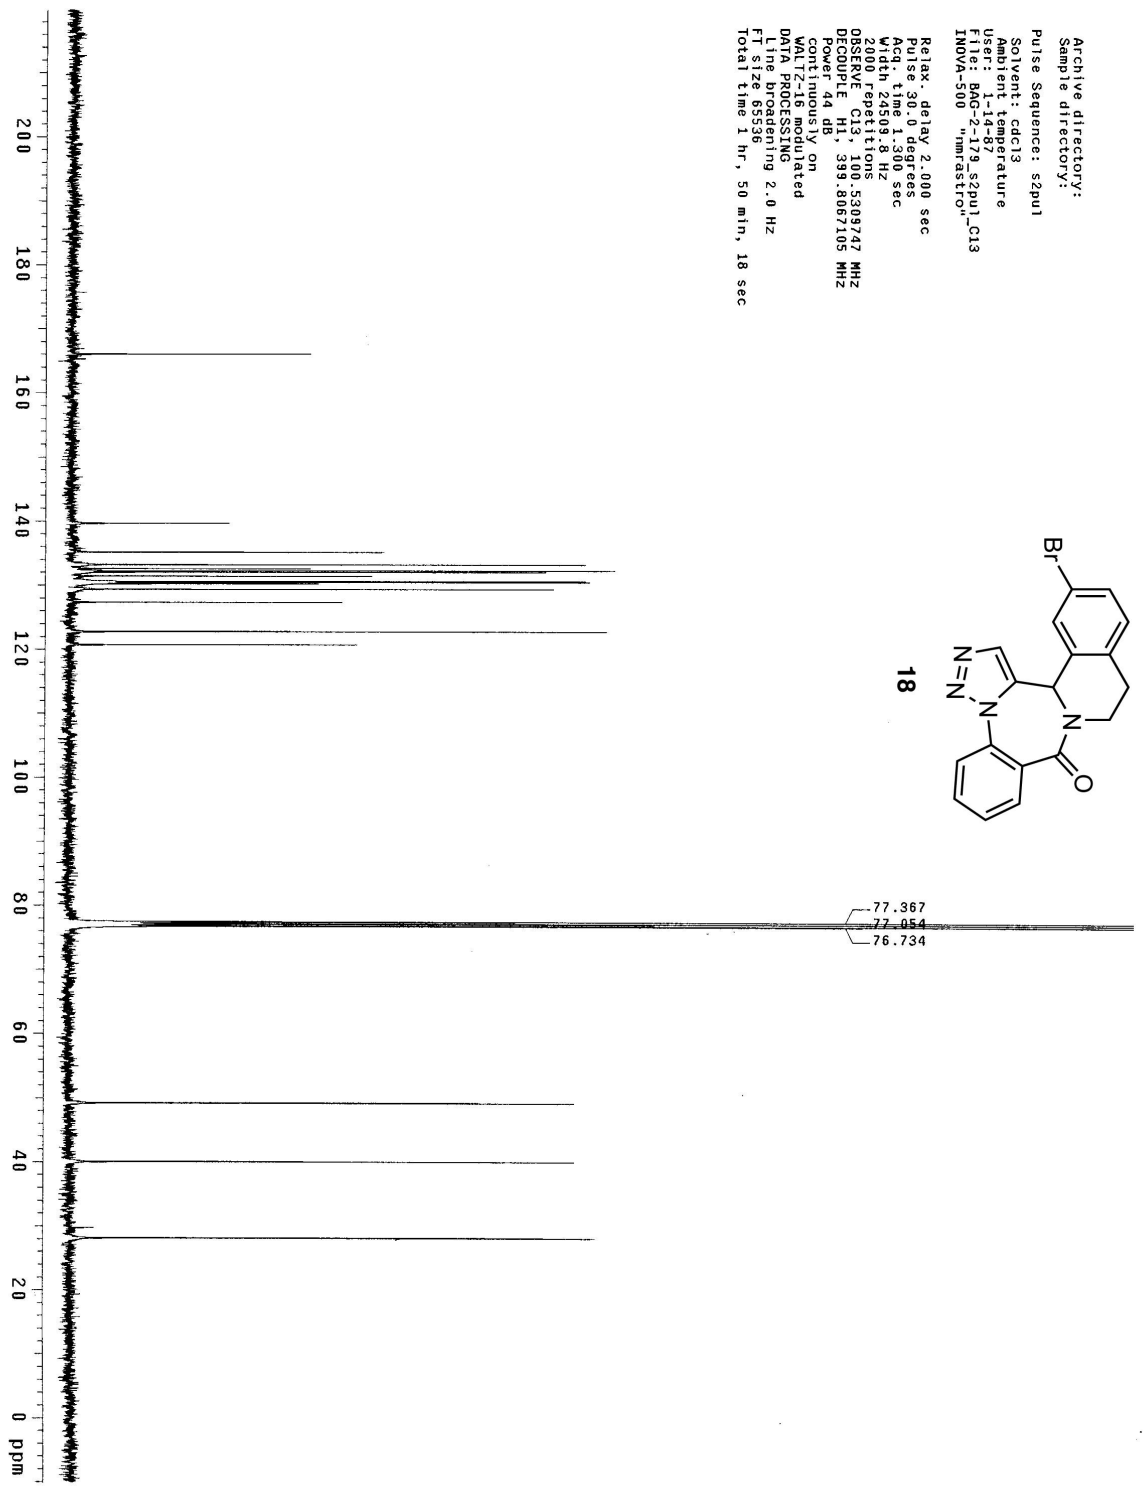

500 MHz nmr 0

BAG-2-270

expt proton

```
SAMPLE 27.0 temp
date Feb 16 2011 gain 30
solvent CDCl3 spn 20
file CDC13 exp 0.008
ACQUISITION PW90 11.000
sw 7997.6 alfa 6.600
at 4.001 alfa
np 64000 j1
pb 4000 j1
bd 32 jn
d1 2.000 dp
nt 64 hs
ct 64 hs
TRANSMITTER H1 lb
tn 499.868 fn 0.10
sfrq 499.868 sp DISPLAY 262144
TOT 499.500 wd 5248.5
tpr 5.000 f1 997.8
pw 1.833 ffp -103.8
DECOUPLER C13 fp lp -3.0
dn 0 PLOT 250
dm mn WC 40
dmn C 14283
dppr 40 256
dmf th 12
ai cdc ph
```

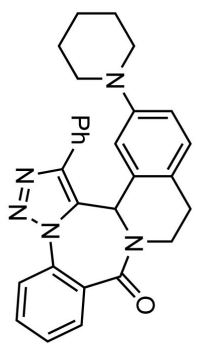

21

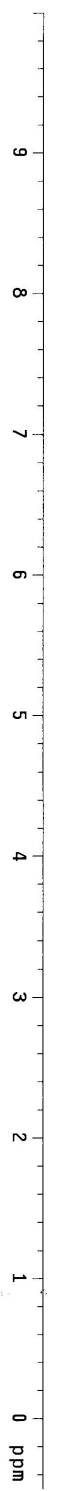



500 MHz nmr0  
BAG-2-270

exp4 Carbon

|             |             |      |          |
|-------------|-------------|------|----------|
| date        | Feb 16 2011 | temp | 27.0     |
| solvent     | cdcl3       | gain | 40       |
| file        | exp         | spin | 20       |
| ACQUISITION | exp         | hst  | 0.008    |
| sw          | 32679.7     | pw90 | 9.500    |
| at          | 1.958       | alra | 10.000   |
| rd          | 12800       | fl   | n        |
| fd          | 1800        | in   | n        |
| bs          | 16          | in   | n        |
| d1          | 2.000       | dp   | hs       |
| nt          | 2000        | hs   | nm       |
| ct          | 2000        | hs   | nm       |
| TRANSMITTER | g13         | fb   | 1.00     |
| th          | 125.013     | fn   | not used |
| strq        | 125.013     | sp   | DISPLAY  |
| td          | 186.53      | wp   | -828.8   |
| tdwr        | 53          | rf1  | 25766.4  |
| pw          | 3.163       | rfp  | 2541.1   |
| DECOUPLER   | H1          | rfp  | 0        |
| dn          | 0           | tp   | -18.2    |
| dof         | 0           | tp   | -210.7   |
| dmm         | yyy         | vc   | PLOT     |
| dmm         | y           | vc   | 250      |
| dmm         | 37          | vc   | 0        |
| dmr         | 10582       | vs   | 10023    |
| dhr         |             | th   | ai       |
| ai          | cdc         | ph   |          |

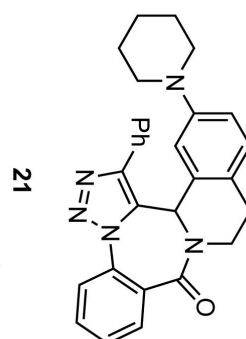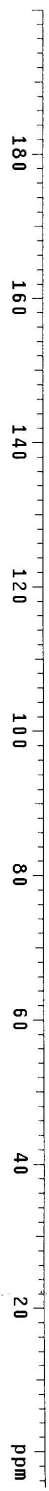

500 MHz nmr0

BAG-2-245

expt proton

```
SAMPLE 27.0 SPECIAL
date Jan 12 2011 temp 27.0
solvent cdcl3 gain 30
file cdc13 exp hst 20
ACQUISITION 0.008
sw 7997.6 pw90 11.000
at 4.001 aifa 6.600
mp 64000 f1
pd 4032 jn
hs 2.000 dp
nt 64 hs
ct 64 hs
TRANSMITTER H1 1b
tn H1 fn 0.10
strq 499.868 SP DISPLAY-250.0
LOT 499.9 fn 262144
ZPW 57 SP 5248.5
pw 1.833 rfi 998.5
DECOUPLER C13 fp rfp -94.8
dn 0 tp PLOT
dof 0 tp -94.4
dm mn WC
dmn 40 SC 250
dppw 40 SC 102
dmr 14285 th 12
aj cdc ph
```

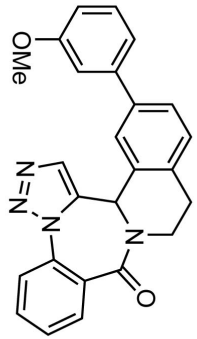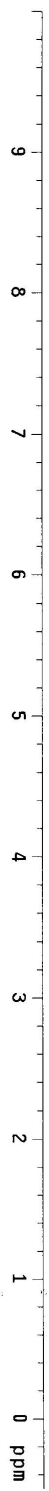

500 MHz mmr0

BAG-2-245

exp4 Carbon

SAMPLE SPECIAL  
date Jan 12 2011 temp 27.0  
solvent cdc13 gain 40  
file exp hst 0.008  
ACQUISITION spm 20  
sw 32679.7 pw90 9.500  
at 1.938 a1f4 10.000  
f1 1.900 11  
f2 1.900 11  
bs 16 1n n  
d1 2.000 dp n  
nt 4000 hs Y  
ct 4000  
TRANSMITTER G13 1b PROCESSING 1.00  
tn 125.413 fn not used  
f1f2 125.413 SP DISPLAY -628.8  
tof 180.53 wp 25766.4  
tpw 3.183 rff1 2541.6  
pw DECOUPLER H1 rfp 0  
dn 0 yyy 1p -15.9  
dm 0  
dmn 0 PLOT -225.9  
dmr 3  
dmv 3  
dms 10582  
dmt 14679  
ai cdc ph 5

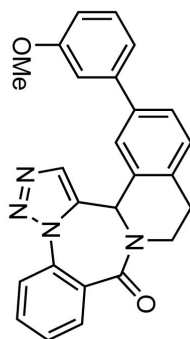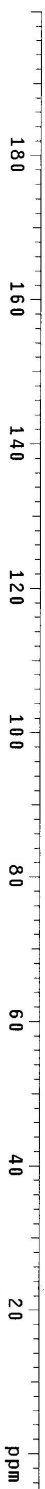

500 MHz mmf0

BAG-2-123

expt1 Proton

```
SAMPLE 3 2010 temp 27.0
date Aug cdc13 gain 30
solvent cdc13 exp hst 0.008
file hst sp1n 20
ACQUISITION 7997.6 pw50 11.000
sw 4.001 aifa 6.600
at 64000 11
f2 4000 11
b2 32 in n
d1 2.000 dp dp n
nt 64 hs hs Y
ct 64 hs hs m
TRANSMITTER H1 1b 0.10
tn 499.889 fn 262144
stfq 499.889 sp DISPLAY -249.9
srf 499.889 wp 5298.5
tpwr 57 rfi 4628.5
pw 1.833 rfp 3619.0
DECOUPLER C13 TP 1p -6.3
dn 0 mn PLOT 250
dm dm 41
dm1 C 250
dm2 41
dm3 41
dm4 14285
dm5 VS 202
dm6 th 12
at cdc ph
```

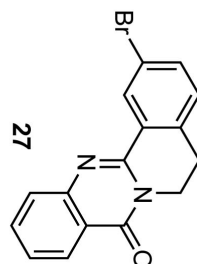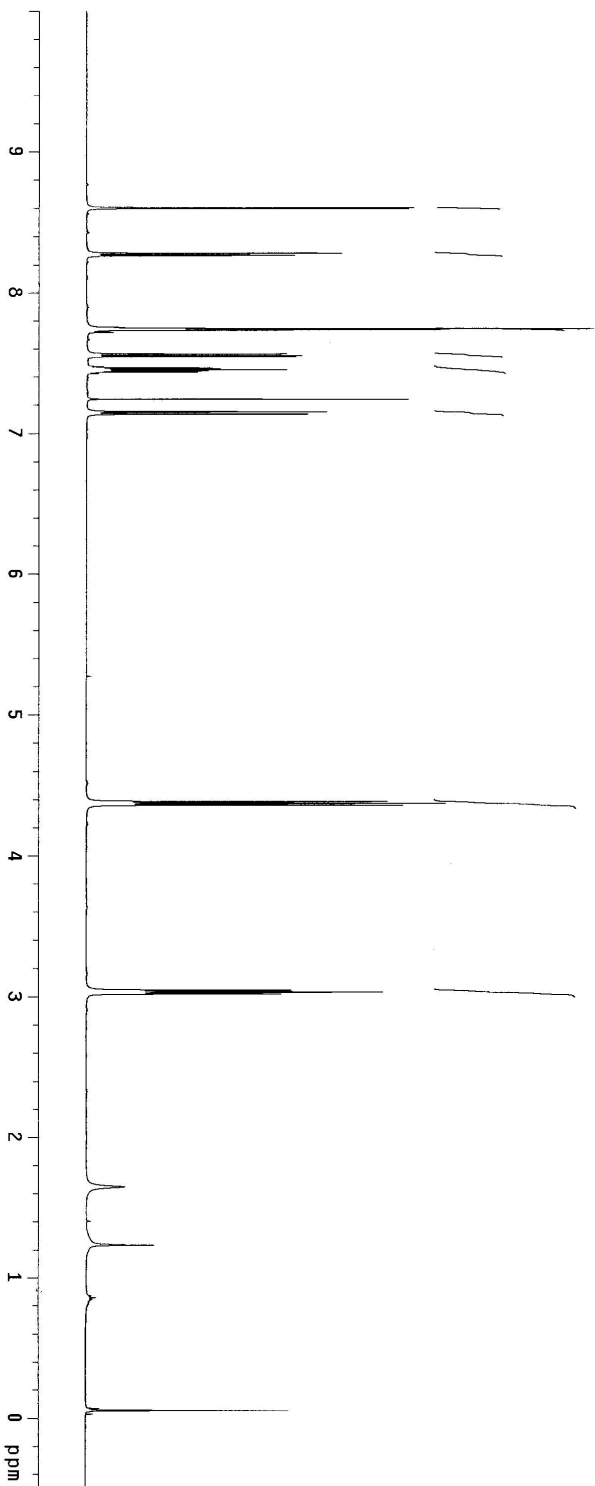

500 MHz nmr 0

BAG-2-123

exp4 Carbon

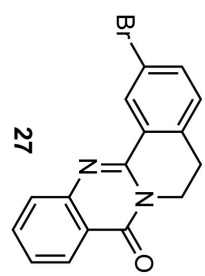

SAMPLE 3 2010 temp 27.0  
date Aug cdc13 gain 40  
solvent exp hst 20  
file exp hst 0.008  
ACQUISITION pw30 9.500  
sw 32573.7 alfa 10.000  
at 1.858  
mp 12800 i1  
ms 1800 in  
bs 16 in  
d1 2.000 dp  
nt 4000 hs  
ct 2672  
TRANSMITTER 2672  
tn 125 013  
sfq 125 09 fn not used  
f1 1863 53 sp DISPLAY -828.5  
tpwr 53 wp 25766.4  
pw 3.163 rf1 12224.5  
DECOUPLER H1 fp 9678.2  
dn 0 tp -110.0  
dof 0 yy PLOT -215.7  
dm yy VC 250  
dm w VC 0  
dm 37 VC 0  
dmr vs 13835  
dmr 10582 th ai cdc ph 5

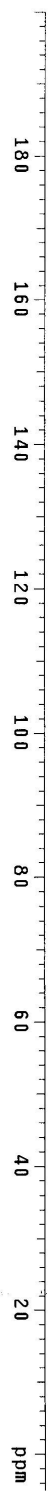

500 MHz nmr 0

BAG-2-152

expt Proton

SAMPLE 27.0  
date Sep 27 2010 temp 27.0  
solvent cdc13 gain 30  
file exp hst spin 20  
ACQUISITION pw90 0.008  
sw 7997.6 pfg 11.000  
at 4.001 alfa 6.800  
f1 64000 i1  
f2 40000 in  
hs 4032 in  
d1 2.000 dp 64  
nt 64 hs  
ct TRANSMITTER h1 1b PROCESSING 0.10  
in 499.889 h1 fn DISPLAY 262144  
strq 493.57 sp 5248.5  
tdwf 1.833 rfi 999.9  
pw DECOUPLER C13 fp 168.8  
dn 0 1p PLOT  
dof 0 nm WC 250  
dm mm C 4  
dmm mm C 659  
dppr 14285 th 12  
dm1 at cdc ph 12

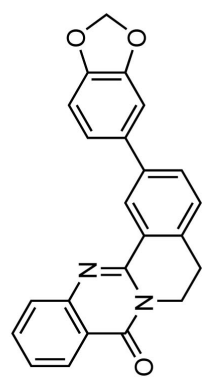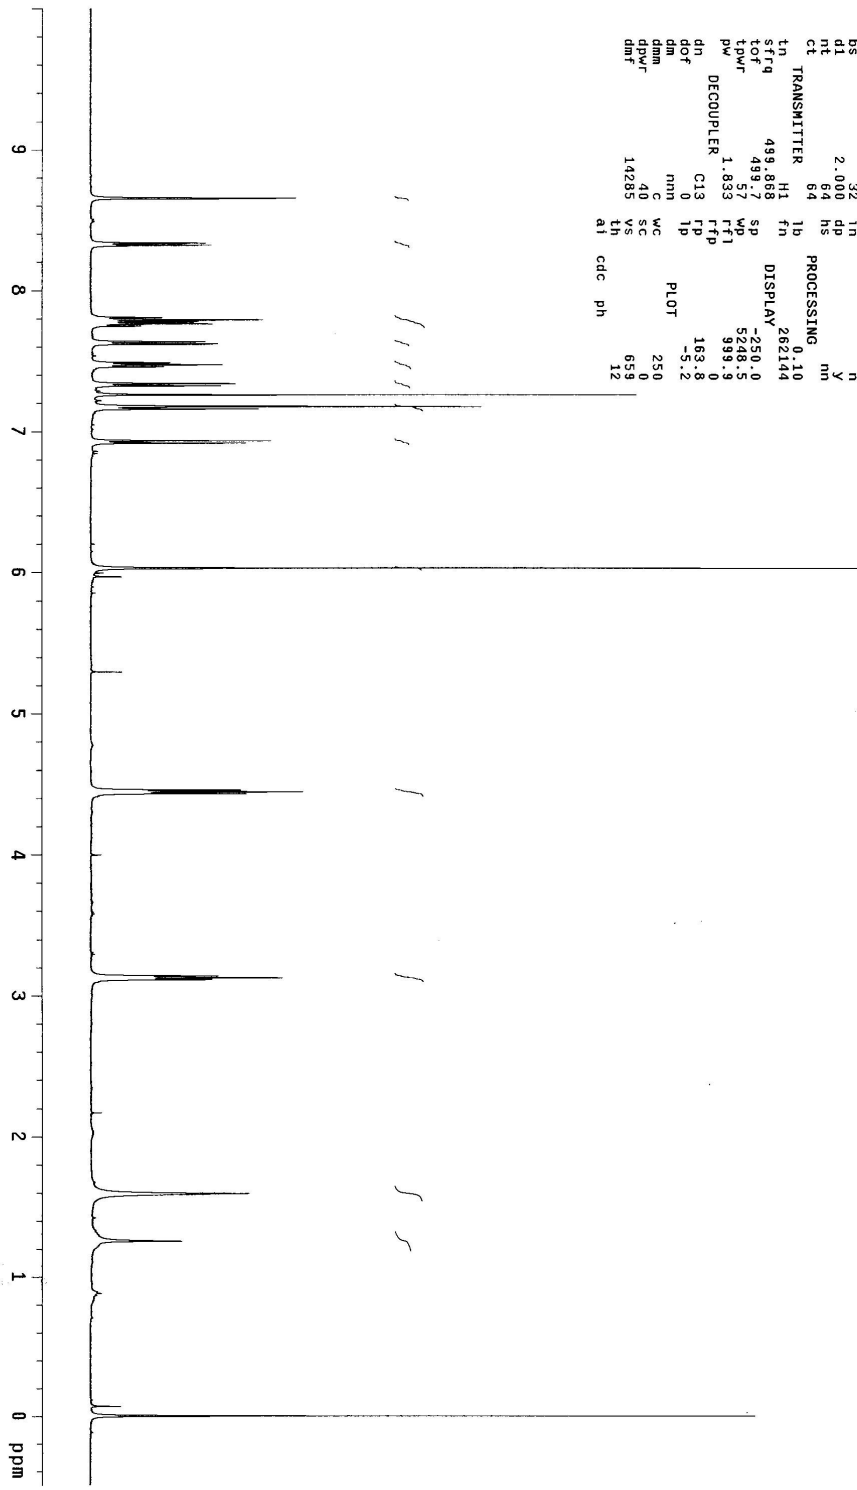

500 MHz mmr 0

BAG-2-152

exp4 Carbon

SAMPLE 27.0  
date Sep 27 2010 temp 27.0  
solvent cdcl3 gain 40  
file exp spm 20  
ACQUISITION hst 0.008  
SW 32579.7 pw30 9.500  
at 12638 a1fa 10.000  
fd 18000  
bs 16 in n  
d1 2.000 dp hs y  
nt 8000 hs mh  
ct TRANSMITTER 8000

PROCESsing 1.00  
f1 not used  
f2 DISPLAY -628.8  
f3 WP 25766.4  
f4 Ff1 2590.1  
f5 Ffp 0  
f6 -111.2  
f7 -213.0  
PLOT 250  
dm yy wc 0  
dm yy wc 250  
dm 37 SC 0  
dm 10582 VS 46133  
at cdc ph 13

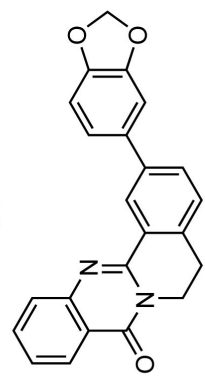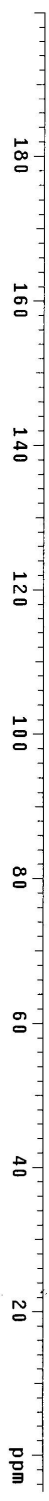

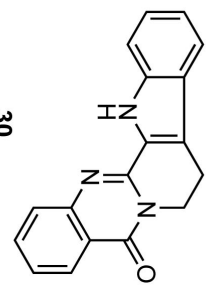

30

Archive directory:  
Sample directory:  
Pulse Sequence: s2pul1  
Solvent: cdcl3  
Ambient temperature  
File: BAG-3-89\_s2pul1\_H1  
INOVA-500 "nmr1roy"  
Relax. delay 2.000 sec  
Pulse 30.0 degrees  
Acq. time 4.000 sec  
Width 6410.3 Hz  
OSSEPPetit@ms99.8047119 MHz  
03SEP2011 11:11  
DATA PROCESSING  
Line broadening 0.1 Hz  
FI size 65536  
Total time 3 min, 24 sec

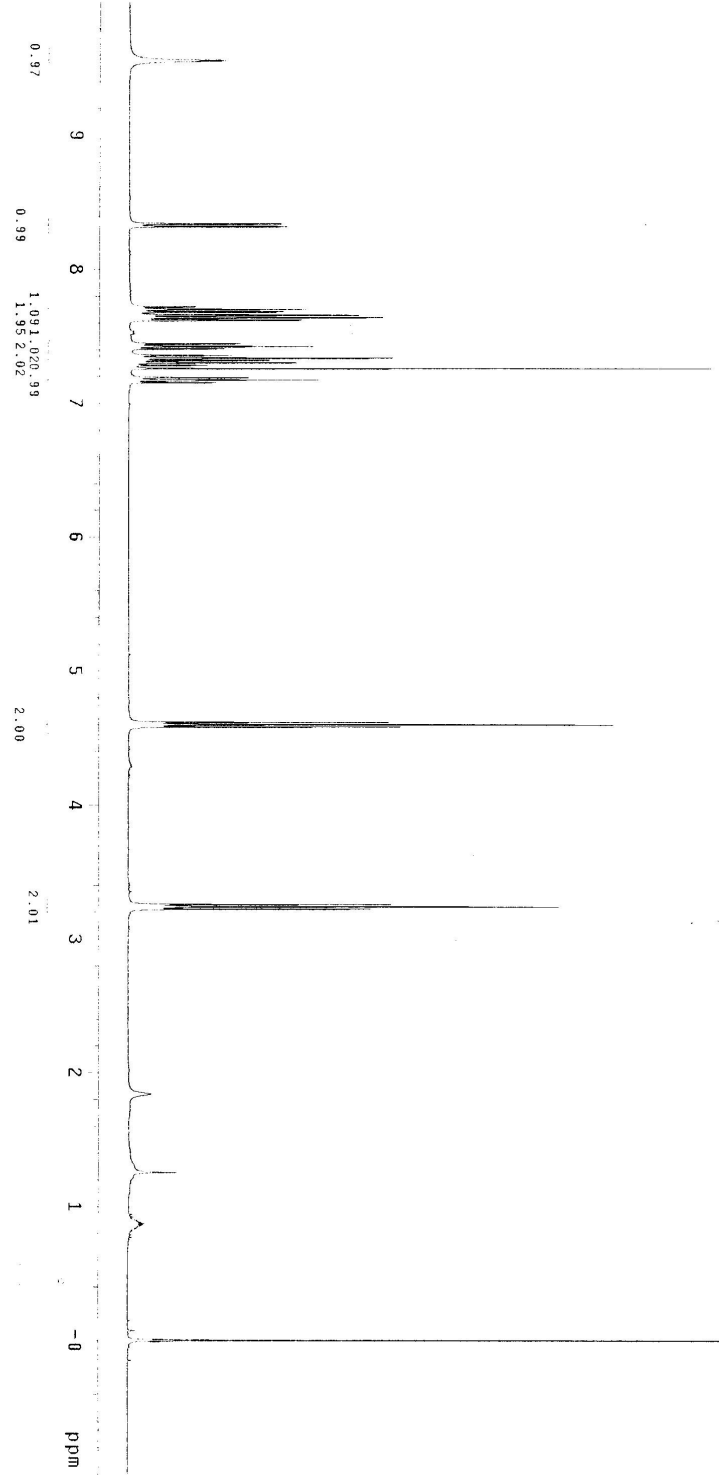



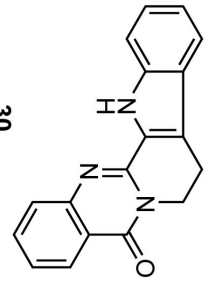

Archive directory:  
 Sample directory:  
 Pulse Sequence: szpul1  
 Solvent: cdcl3  
 Ambient temperature  
 User: 1-14-87  
 INVA: 3-182\_s2pul1\_C13  
 INVA: 500 mmHertz  
 Relax: delay 2.000 sec  
 Pulse: 30.000 usec  
 Acq: time 1.900 sec  
 Width 24509.8 Hz  
 2000 Repetitions  
 OBSERVE C13, 100.5309764 MHz  
 DECOUPLE H1, 399.8067105 MHz  
 Power 44 dB  
 Continuously on  
 Wavelength indicated  
 DATA PROCESSING  
 Line broadening 2.0 Hz  
 FT size 65536  
 Total time 1 hr, 50 min, 18 sec

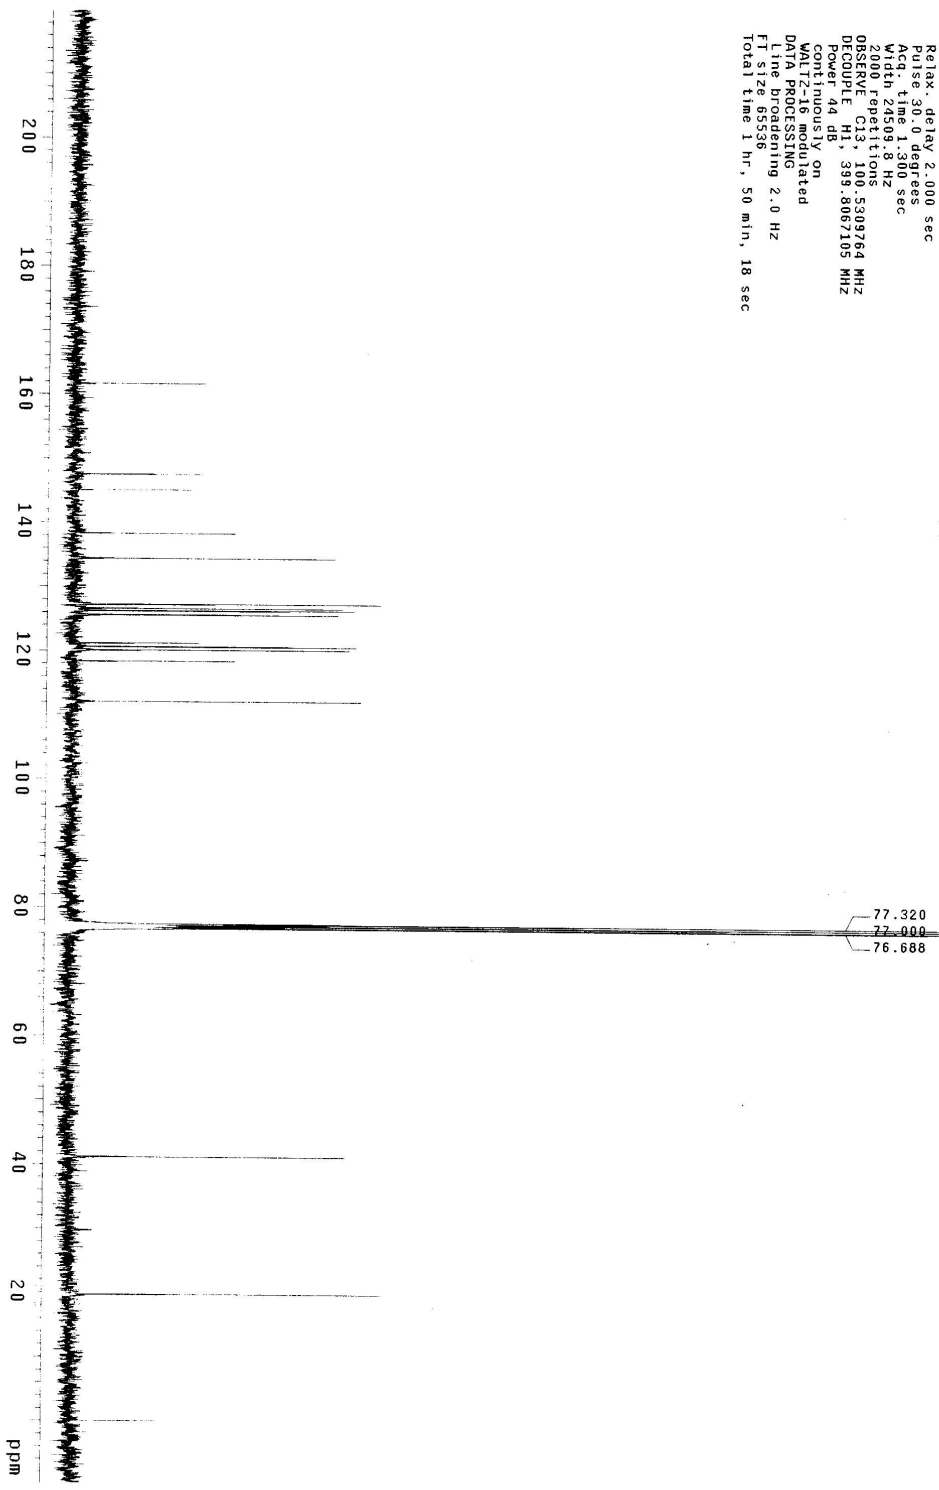

Supplement: NIHMS318514-supplement-1_si_001.pdf [file NIHMS318514-supplement-1_si_001.pdf]
